## Microbial and Metabolic Succession on Common Building Materials Under High Humidity Conditions

Simon Lax<sup>1\*#</sup>, Cesar Cardona<sup>2,3#</sup>, Dan Zhao<sup>4</sup>, Valerie J. Winton<sup>5</sup>, Gabriel Goodney<sup>6</sup>, Peng Gao<sup>5</sup>, Neil Gottel<sup>3</sup>, Erica M. Hartmann<sup>7</sup>, Chris Henry<sup>8</sup>, Paul M. Thomas<sup>5</sup>, Scott T. Kelley<sup>6</sup>, Brent Stephens<sup>4S</sup>, Jack A. Gilbert<sup>3S</sup>

<sup>1</sup> Department of Ecology and Evolution, The University of Chicago

<sup>2</sup> Graduate Program in Biophysical Sciences, The University of Chicago

<sup>3</sup> Department of Surgery, The University of Chicago

<sup>4</sup> Department of Civil, Architectural and Environmental Engineering, Illinois Institute of Technology

<sup>5</sup> Proteomics Center of Excellence and Department of Molecular Biosciences, Northwestern University

<sup>6</sup> Department of Biology, San Diego State University

<sup>7</sup> Department of Civil and Environmental Engineering, Northwestern University

<sup>8</sup> Mathematics and Computer Science, Argonne National Laboratory

\* Present Address: Center for the Physics of Living Systems, Department of Physics, MIT

# These authors contributed equally to this work

<sup>S</sup> Co-corresponding Authors: [brent@iit.edu](mailto:brent@iit.edu); [gilbertjack@gmail.com](mailto:gilbertjack@gmail.com).

### 1 ABSTRACT

2 Despite considerable efforts to characterize the ecology of bacteria and fungi in the built  
3 environment (BE), the metabolic mechanisms underpinning their colonization and successional  
4 dynamics remain unclear. Here, we applied bacterial/viral particle counting, qPCR, 16S and ITS  
5 rRNA amplicon sequencing, and metabolomics to longitudinally characterize the ecological  
6 dynamics of four commonly used building materials maintained at high humidity conditions  
7 (~94% RH). We varied the natural inoculum provided to each material by placing them in different  
8 occupied spaces, and we wet the surface of half of the samples of each material to simulate a  
9 flooding event. As expected, different materials showed different bacterial and viral particle  
10 abundance, with wet materials having higher growth rates and lower alpha diversity compared to  
11 non-wetted materials. Wetting described the majority of the variance in bacterial, fungal and  
12 metabolite structure, and material type only influenced bacterial and metabolic diversity, while  
13 location of inoculation was only weakly associated with bacterial and fungal beta diversity.  
14 Metabolites indicative of microbial activity were identified, as were those that were native to the  
15 surface material. Glucose-phosphate was abundant on all materials (except mold-free gypsum) and  
16 was correlated with *Enterobacteriaceae*, which could indicate a potential bacterial nutrient source.  
17 A compound consistent with scopoletin, a plant metabolite with antimicrobial activity, was  
18 significantly negatively correlated with *Bacillus* and positively correlated with *Pseudomonas* and  
19 enriched in medium density fiberboard (MDF) materials. In wet samples, the alkaloids nigragillin  
20 and fumigaclavine C, both with antimicrobial properties, were significantly positively correlated  
21 with the fungal phylum Ascomycota. Nigragillin, was also negatively correlated with *Bacillus* and  
22 *Pseudomonas* abundance. Thiabendazole and azoxystrobin (anti-fungal compounds) were highly  
23 abundant on mold-resistant gypsum wallboard and likely directly influenced the decreased fungal  
24 growth observed on this material. The mold-resistant gypsum material also showed a significant  
25 increase in bacterial alpha diversity, and bacterial and viral particle abundance, as well as a  
26 decrease in metabolite diversity, likely a result of reduced fungal growth. *Penicillium* taxa were  
27 positively correlated with thiabendazole, which suggested the persistence of resistant strains. Also,

28 specific to the wet samples, *Bacillus* abundance was positively correlated with the azoxystrobin,  
29 suggesting bi-directional competitive adaptation, and positively correlated with metabolites known  
30 to interfere with *Pseudomonas* biofilm formation, which could explain the anti-correlation  
31 between these taxa. As expected, high moisture conditions enabled faster growth of inoculating  
32 microorganisms, whose composition, chemistry, and competition was shaped by surface material,  
33 suggesting that both fungal and bacterial growth need to be considered when determining the  
34 impact of dampness in built environments.

35

## 36 INTRODUCTION

37

38 The microbiology of the built environment comprises bacteria, archaea, fungi, viruses and  
39 protists, all of which maintain growth potentials under varying physicochemical regimes. Many  
40 recent studies of this ecosystem have applied molecular sequencing techniques to characterize  
41 microbial community relationships and dynamics under varying occupant density, building type  
42 and location, environmental conditions, and material type (Lax *et al.*, 2017; Adams *et al.*, 2016;  
43 Chase *et al.*, 2016; Stephens, 2016; Lax *et al.*, 2014). However, most of these studies have  
44 investigated communities sampled from relatively dry materials on which microbes are likely  
45 biologically inactive unless they experience liquid water or high relative humidity (RH) (Chase *et*  
46 *al.*, 2016). It is widely accepted that fungal growth can occur at RH >75-80% and material decay  
47 can occur at RH >95%, depending on material (Viitanen *et al.*, 2010, Johansson *et al.*, 2012).

48 Dampness is a fairly common occurrence in buildings, with approximately half of all  
49 homes in the U.S. having experienced dampness or mold (IAQ Report - Prevalence of Building  
50 Dampness). Building material dampness occurs for different reasons, including: bulk liquid entry  
51 from floods, extreme weather events, and plumbing system problems; rain or snow entry through  
52 leaks in building envelopes and roofing systems; and high water vapor content resulting from  
53 moisture migration through building materials or condensation of warm humid air on cold surfaces  
54 (IAQ Report - Nature and Causes of Building Dampness). Dampness and the presence of visible  
55 mold have been consistently associated with adverse human health outcomes, including respiratory  
56 and allergic effects (Mendell *et al.*, 2011, Quansah *et al.*, 2012, Fisk *et al.*, 2010, Jaakkola *et al.*,  
57 2013). Hypotheses to potentially explain these associations include a combination of exposure to  
58 specific microbial agents (Institute of Medicine, 2004), varied gene expression and metabolism  
59 (Hegarty *et al.*, 2018), and the release of fungal metabolites including mycotoxins (Miller *et al.*,  
60 2014) and microbial volatile organic compounds (mVOCs) (Roze *et al.*, 2013).

61 Although fungal growth on building materials has been studied for decades (Hyvärinen *et*  
62 *al.*, 2002, Gravesen *et al.*, 1999, Hoang *et al.*, 2010; Pasanen *et al.*, 1992), only a limited number  
63 of studies have used molecular techniques to investigate bacterial and fungal growth, microbial  
64 community dynamics, and/or metabolic activity on common buildings materials exposed to liquid  
65 water and/or high humidity conditions (Coombs *et al.*, 2017). Therefore, we characterized the  
66 bacterial and fungal concentration and diversity, as well as the production of microbial metabolites,  
67 on samples of four common building materials incubated at ~94% relative humidity: oriented  
68 strand board (OSB), medium density fiberboard (MDF), gypsum wallboard, and mold-resistant  
69 gypsum wallboard. We varied the BE source of inoculation and purposely wet half of the samples  
70 to assess how indoor microbial sources and the presence of liquid water influence community  
71 structure and metabolite profiles of these materials over multiple time points. We used several  
72 techniques to quantify microbial growth and microbial community composition and functional  
73 metabolism including: bacterial and viral like particle counts, image processing of visible mold

74 growth, qPCR, amplicon sequencing of 16S and ITS rRNA marker genes, and metabolomics.  
75 Results from these different methods were integrated via co-occurrence network approaches,  
76 which provided insights into microbial community organization and environmental interaction.  
77 Improved understanding of how bacterial and fungal metabolism is shaped by environmental  
78 properties (e.g., the presence of water, surface material composition) and inoculating source (e.g.,  
79 building location, occupancy patterns) could have important implications for architectural design,  
80 construction, building management, and occupant health (Rand *et al.*, 2017). Therefore,  
81 determining the microbial metabolic dynamics in these high RH environments should be an  
82 important research priority.

83

## 84 RESULTS

85

### 86 *Experimental Setup*

87

88 Our study used four building materials types: oriented strand board (OSB), medium density  
89 fiberboard (MDF), regular gypsum wallboard, and mold-resistant (i.e., mold-free, or ‘MF’)  
90 gypsum wallboard. Coupons of 5 cm × 5 cm of each material type were naturally inoculated at  
91 two different locations for about 50 days each. After the inoculation period concluded, the time  
92 that occupants were coming in close proximity was reported with similar values, a 0.16% and  
93 0.18% of total time. The material coupons were sampled for off-line biological and chemical  
94 analysis at 7 different sampling time points, referred to here as TP0, TP1, TP2, TP3, TP4, TP5,  
95 and TP6. The initial samples (TP0) were taken just after retrieving the samples from the field  
96 inoculation and represent non-wetted, naturally inoculated samples previously held at normal  
97 residential humidity condition. After inoculation, half of each set of materials from each location  
98 were submerged in tap water in separate pans for ~12 hours to simulate the process of wetting of  
99 building materials due to a flood or leak. Different sampling strategies were tested and after  
100 statistical verification all samples of the same type were combined as technical replicates (**Figure**  
101 **S1**). Microbial datasets were later rarefied to same sequencing depth: 1,000 reads for bacteria and  
102 10,000 reads for fungi. Unfortunately, rarefaction removed all bacterial samples from MDF  
103 materials, which had very low read counts. After rarefying the data, a comparison of the control  
104 and non-control samples reflected that control samples looked very similar in bacterial and fungi  
105 diversity than non-control samples, (mantel  $\geq 0.49$  and  $\geq 0.43$  for location 1 and location 2  
106 respectively, all with a  $p < 1E-05$ ), perhaps because air could still transmit through the non-  
107 hermetic foil cover and microbes from the interior of the wood (not killed with the sterilization)  
108 could have found their way to the surface. Highlighting that the coupon itself could still be an  
109 important contributor to microbial diversity for all samples. From these results, the control location  
110 was treated indistinctly than the other two locations. For more details see Materials and Methods  
111 section.

112

### 113 *Visible growth, particulate counts and qPCR*

114

115 Visible microbial growth occurred much faster and covered a far greater percentage of the surface  
116 area on wet tiles than on non-wetted tiles (**Figure 1A**). OSB and MDF had the greatest coverage  
117 and fastest growth: all wet OSB and MDF tiles reached at least 50% visible microbial coverage by  
118 day 20, while non-wetted tiles of these types reached  $< 25\%$  coverage. No growth was ever visible  
119 on the mold-resistant gypsum tiles. Epifluorescence microscopy revealed that counts of bacterial

120 like particles (BLP) and viral-like particles (VLPs) calculated on samples TP0 to TP3 were  
121 strongly correlated ( $R^2 = 0.65$ ,  $p = 2.8e^{-23}$ ) (**Figure 1B**), with VLP counts statistically lower than  
122 bacterial counts in all samples (ANOVA  $\leq 10^{-4}$ ) and in both wet and non-wet conditions (two  
123 sided non-parametric t-test  $p \leq 0.035$ ) **Figure 1C**). This is in keeping with previous research that  
124 found very low VLP:bacteria ratios in the indoor environment (Prussin *et al.*, 2015, Gibbons *et al.*,  
125 2015). In our dataset, the mean VLP-bacteria ratio was  $0.86 \pm 0.07$ , with a minimum of 0.61 and  
126 a maximum of 1.02 across all samples.

127  
128 While BLP (only estimated for TP0 to TP3 samples) and bacterial qPCR agree that wetted samples  
129 had higher counts than non-wetted samples, cell counts inferred from these two methods  
130 drastically differ for different material types and over time. Most notably, the MF-gypsum had the  
131 greatest BLP counts but also the lowest 16S rRNA qPCR counts (6-fold or more lower than other  
132 materials). Moreover, the BLP cell counts were essentially constant over time, while qPCR counts  
133 steadily increased, with TP6 being 4-fold greater than TP1 and 209-fold greater than TP0 counts.  
134 To further confirm the differences, we calculated the overall correlation between paired bacterial  
135 qPCR and BLP counts and the results were not significant, emphasizing different biases for each  
136 method.

137  
138 For fungal qPCR we observed MF-gypsum had the lowest abundance, while all other materials  
139 had a range of 20 to 118-fold increase over MF-gypsum. Wetted samples revealed a 4-fold increase  
140 in qPCR read abundance over non-wetted samples. Also, the qPCR read abundance increased  
141 steadily over time, in such a way that TP6 was 11-fold greater than TP1 and 750-fold greater than  
142 TP0 counts.

#### 143 144 *Bacterial, fungal and metabolite diversity*

145 The bacterial and fungal communities in our study tended to decrease in diversity over time, as  
146 measured by the Shannon Index (Shannon  $H'$ ), which incorporates both the richness and evenness  
147 of the community. Given that our data was rarified to an even depth before analysis, this decrease  
148 in diversity is indicative of the increasing relative abundance of certain community members, and  
149 suggests the preferential proliferation of certain taxa in the inoculating community. In our 16S  
150 dataset, wet samples experienced faster declines in diversity than non-wetted samples, and were  
151 significantly lower in diversity at the end of the study than non-wetted samples (**Figure 2A**),  
152 suggesting that certain bacterial taxa grew quickly in the wet environment and became dominant  
153 within the community. In our ITS dataset, we also observed a faster decline in diversity in wet  
154 samples, although wet samples were significantly more diverse than non-wetted samples by the  
155 end of the study (**Figure 2B**). The decrease in fungal diversity in wetted samples was not  
156 monotonic, with an initially steep decline and a subsequent increase. This may reflect fast growth  
157 by a small number of taxa that quickly dominated the community, followed by the growth of other  
158 taxa with slower growth rates. Similar patterns are observed when looking at the diversity changes  
159 for each individual material (**Figure S2**) with the exception of a lack of bacterial growth for wet  
160 MDF samples and reduced bacterial growth on dry OSB after the study was half way completed.  
161 In contrast, we observed no significant changes in the metabolic diversity over time for either wet  
162 or non-wetted samples (**Figure 2C**).

#### *Microbial Compositional Changes*

163 Across all samples, the diversity of bacteria within the community was significantly correlated to  
164 the diversity of fungi (Corr = 0.28,  $p=0.0003$ ) (**Figure 3A**). Interestingly, neither bacterial nor  
165 fungal diversity was significantly correlated to the metabolite diversity, perhaps because of a  
166 narrower range of observed metabolite diversity compared to the taxonomic datasets. We observed  
167 striking changes in the relative abundance of certain bacterial (**Figure 3B**) and fungal (**Figure 3C**)  
168 genera over time, which were largely dependent on wetting condition. In the 16S rRNA dataset,  
169 *Bacillus* almost immediately came to dominate wet samples, with an average relative abundance  
170 as high as 50% after the 2<sup>nd</sup> time point, even though it represented a negligible part of the  
171 community at the start of sampling. *Bacillus* abundance also increased in non-wetted samples,  
172 although to a much smaller extent. A similar pattern was observed for the genera *Pseudomonas*  
173 and *Erwinia*, which also represented a very small fraction of community diversity at the start of  
174 sampling but quickly increased in abundance in wet (but not non-wetted) samples. Interestingly, a  
175 very large percentage of reads from early time point samples, both wet and non-wet, were of  
176 chloroplast origin. In wet samples, the number of chloroplast reads quickly declined as the  
177 bacterial genera proliferated. In non-wetted samples, chloroplast read abundance remained high,  
178 and dominated the sequencing effort to such an extent that discarding those reads would have  
179 dropped the majority of non-wetted samples below the rarefaction depth. While these likely  
180 represent residual DNA signatures from the plant material used to construct each tile material, we  
181 have chosen to keep them in the analysis. **Figure S3A** shows how this dynamic slightly vary for  
182 each different material type.

183 The majority of reads in the ITS dataset that could be taxonomically assigned to a genus belonged  
184 to one of two genera: *Eurotium* and *Penicillium*. *Eurotium* abundance was negligible at the  
185 beginning of community succession but quickly flourished in non-wetted samples, becoming the  
186 most abundant known genus in those samples by time point 2 (**Figure 3C**). By contrast, *Eurotium*  
187 did not become abundant across wet samples. *Penicillium* abundance was, on average, consistently  
188 higher in wet samples than in non-wetted samples, and its abundance was significantly anti-  
189 correlated to *Eurotium* relative abundance (corr = -0.12,  $p = 0.033$ ). These taxa-specific changes  
190 were mirrored by community level differentiation, where wet vs. non-wetted tiles of the same  
191 material and inoculating location became significantly more dissimilar (Bray Curtis, Spearman's  
192 Correlation,  $p<0.01$ ) in both their bacterial and fungal community structure over time (**Figure 3D**).  
193 **Figure S3B** shows how this dynamic slightly vary for each different material type.

194

### 195 *Environmental Factors Associate with Microbial and Metabolite Diversity*

196 We used ANOSIM to calculate the factors significantly correlated with differences in the microbial  
197 communities across our three datasets. Bray-Curtis dissimilarity was calculated for the 16S, ITS,  
198 and metabolite datasets, and ANOSIM was used to determine whether distances between samples  
199 of the same metadata factor (i.e. wetting condition, inoculating location, and material) were  
200 significantly lower than distances between samples of different types (**Figure S4**). In our 16S  
201 rRNA dataset, wetting condition, location, and material each had a significant impact on bacterial  
202 community structure (all  $p < 0.0001$  based on  $10^5$  randomized permutations), with wetting having  
203 the most pronounced effect ( $R = 0.418$ ). In general, non-wetted samples tended to be more similar  
204 to each other than wet samples were to each other, which is likely due to the dominance of a single

205 chloroplast OTU. Material had a less pronounced effect ( $R=0.247$ ) and location had the least  
206 evident effect on bacterial community structure ( $R=0.133$ ).

207 Interestingly, fungal community structure was not significantly described by variance in material,  
208 while location had a relatively weak ( $R = 0.129$ ) though highly significant ( $p < 0.0001$ ) association,  
209 suggesting that variations in fungal communities that settle on materials (which have been shown  
210 to be driven largely by outdoor fungal communities, e.g., Adams *et al.*, 2013) influence community  
211 structure upon experiencing wetting and high RH conditions. Wetting condition was by far the  
212 most influential factor influencing fungal community structure ( $R = 0.564$ ,  $p < 0.0001$ ), and in  
213 contrast to the bacterial data, wet samples were much more similar to each other than were non-  
214 wetted samples. Metabolite diversity within the community was also affected by wetting condition  
215 ( $R = 0.276$ ,  $p < 0.0001$ ), with non-wetted samples more similar to each other than wet samples.  
216 Material also played a significant role in metabolite diversity ( $R = 0.231$ ,  $p < 0.0001$ ), and mold-  
217 free gypsum samples were particularly metabolically similar, likely due to the lack of fungal  
218 growth and the underlying chemical composition of the material. Inoculating location had no  
219 significant effect on the diversity of metabolites despite having a significant effect on both the  
220 bacterial and fungal community membership. We visualized sample similarity using non-metric  
221 multi-dimensional scaling (NMDS) ordination based on Bray-Curtis dissimilarity (**Figure 4**). We  
222 converted material, location, and wetting condition into binary variables (1 = yes, 0 = no), which  
223 were fit onto the ordination, keeping only the significant vectors ( $R^2$  values for each vector and  
224 their significance is presented in **Table S1**). Visually, both bacterial and fungal beta diversity was  
225 more differentiated by wetting condition due to the significant increase in growth on wetted tiles,  
226 while metabolites were visually differentiated by both wetting condition and surface material,  
227 likely due to the underlying chemistry of the material and then the subsequent metabolic activity  
228 of the microbes when tiles were wetted.

229

### 230 *Bacterial and fungal network co-occurrence*

231 Using SparCC (Friedman & Alm, 2012), an algorithm developed to quantify correlations on  
232 microbial compositional data (data that has been subject to rarefaction), and a correlation threshold  
233  $>0.4$ , uncovered co-occurrence patterns between taxa from each kingdom. In the bacterial network  
234 (**Figure S5**) three co-occurrence clusters were identified, the *Bacillus* cluster, *Pseudomonas*  
235 cluster, and a cluster comprising chloroplasts and mitochondria. As expected these groups  
236 correspond with the most abundant taxa. On all wet materials and on all samples of gypsum (both  
237 wet and non-wet), 95% of associations between *Bacillus* and *Pseudomonas* were negative  
238 correlations (**Figure S6 and S7**). On non-wetted OSB, MDF and MF-Gypsum there were no  
239 negative correlations between *Pseudomonas* and *Bacillus*. Interestingly, there is a dramatic  
240 increase in the absolute number of significant co-occurrence relationships between bacterial OTUs  
241 in wet (74) versus non-wetted samples (48), which is a 54% increase in the number of edges. In  
242 the fungal correlation network, *Penicillium* OTUs co-occurred with many unknown fungal genera,  
243 while OTUs corresponding to *Aspergillus* and its subset, *Eurotium*, maintained monophyletic  
244 clusters (**Figure S8**). As with the bacterial co-occurrence networks, fungal OTUs associated with  
245 wet tiles had negative correlations among each other, although the number was much smaller than  
246 for bacteria. Only 7 fungal OTUs were negatively correlated on wet materials, mainly between  
247 unknown genera and an abundant *Penicillium* OTU (**Figure S9**). Strikingly, unlike bacteria, the  
248 absolute number of significant co-occurrence relationships between fungal OTUs declined in wet

249 (555) versus non-wetted samples (1,133), which was a 104% decrease in the number of edges,  
250 suggesting an inverse co-abundance response between bacteria and fungi during growth.

251 To better understand the co-associations between bacteria and fungi, 16S and ITS OTUs were co-  
252 correlated in a single network. A random walk-based method uncovered four distinct modules  
253 within the network, with a modularity of 0.45 (**Figure 5A**). In general, the taxa present in each  
254 sample tended to cluster within an individual network module (median sample association to  
255 module = 0.88). We correlated various metadata factors to module membership (**Figure 5B**) and  
256 observed that wetting condition had a significant impact on which samples dominated each  
257 module: modules 1 and 3 were associated with wet samples, while modules 2 and 4 were associated  
258 with non-wetted samples (**Figure 5C**). Location 1 samples dominated module 3, while Location 2  
259 samples dominated module 1 (**Figure 5D**). Overall, wetting condition appears to be the most  
260 important factor driving community succession, resulting in two different community structures  
261 even when the source community is identical. We also visualized the nodes that were assigned to  
262 the genera previously discussed in Figure 3. Nodes in the bacterial genera *Bacillus*, *Pseudomonas*,  
263 and *Erwinia*, as well as the fungal genus *Penicillium*, were nearly exclusively enriched in the two  
264 wet-associated modules (1 and 3), while chloroplast reads and *Eurotium* nodes all clustered within  
265 the non-wetted modules (2 and 4; **Figure 5E**).

#### 266 *Metabolite network co-occurrence*

267 A co-occurrence network correlation was calculated for the sample metabolite profiles (**Figure 6**).  
268 As these data are not compositional, we built this network using significantly positive Spearman  
269 correlations between nodes and included only the 1,000 most abundant metabolites in the dataset.  
270 This resulted in a network with 149,316 edges (density = 0.30) when the significance threshold  
271 (alpha) was set to 0.001. Using the same module discovery method described above, we uncovered  
272 7 distinct modules (modularity = 0.32), excluding 12 metabolites around the periphery of the  
273 network that clustered into modules of <5 nodes. Three modules (3, 4, and 7) were significantly  
274 correlated with wet samples, while modules 1, 2, 5 and 6 were associated with non-wetted samples.  
275 There was almost no correlation between network modules and inoculating locations, further  
276 suggesting that while location (and hence the primary inoculating microbes) may influence  
277 community taxonomic diversity, it does not appear to strongly affect metabolic diversity during  
278 growth. The abundance of metabolites in module 7 were anti-correlated with all other modules,  
279 but specifically with module 2 (corr = -0.87,  $p < 0.001$ ). Module 7 is dominated by wet samples at  
280 later time points, suggesting that community succession in wet environments may converge to a  
281 common metabolic profile, which is wholly distinct from the non-wetted samples in module 2.

#### 282 *Metabolite features can predict sample type*

283  
284  
285 Random Forest analysis was employed to determine the metabolites associated with various  
286 sample types. Models classifying whether a sample was wet had an average accuracy of 98% (error  
287 ratio = 25, with expected random error 0.5), and wet-samples were never misclassified as a non-  
288 wetted sample in any of the 10 model iterations. Models classifying samples based on material  
289 were similarly successful, with an average accuracy of 97% (error ratio = 25, with expected  
290 random error 0.75). Metabolomics models were much less successful at predicting the inoculating  
291 location, with a mean success of 72% (error ratio = 2.36 with expected random error 0.67). We  
292 sought to gain insight into the chemical composition of metabolites that comprise the signatures

293 observed in these models. Feature importance scores were assigned to compounds based on their  
294 relative contributions to predicting sample type. For both the wetting condition dependent and  
295 material dependent groups, we selected the 100 highest-scoring metabolite features for further  
296 examination and chemical identification (**Figure S10**). Wet samples were enriched with 98 of the  
297 100 top-scoring metabolites that differentiated wet and non-wetted. None of these compounds  
298 were automatically identified by mzCloud, so the metabolites were analyzed via external database  
299 searches, and compound classes were designated based on fragmentation spectra. A diverse set of  
300 compound families was observed, including compounds likely to be carbohydrates and  
301 glycoconjugates, fatty acids, prenol lipids, sterol lipids, polyketides, and glycerolipids, as well as  
302 several pyridine derivatives including a form of vitamin B6, indicative of microbial activity and  
303 growth and compounds associated with the surface materials.

304  
305 Metabolites that were highly enriched in wet vs non-wetted conditions underwent additional  
306 manual analysis for confident structural identification. One of these metabolites was identified as  
307 Nigragillin ( $C_{13}H_{22}N_2O$ , accurate mass = 222.1723), which is a fungal alkaloid first identified in  
308 *Aspergillus niger* (Isogai *et al.*, 1975). Nigragillin abundance was significantly enriched in wet  
309 MDF and OSB samples (505- and 280-fold, respectively) compared to non-wetted samples.  
310 However, no significant differences in nigragillin were observed for gypsum or MF-gypsum. In  
311 both wet MDF and OSB the nigragillin concentration increases over time (**Figure S11**). Another  
312 high-scoring metabolite showed MS/MS fragmentation consistent with Fumigaclavine C  
313 ( $C_{23}H_{30}N_2O_2$ , accurate mass = 366.2291), which is a fungal alkaloid first identified in *Aspergillus*  
314 *fumigatus* (Cole *et al.*, 1977). Fumigaclavine C was enriched in wet samples of gypsum, MDF,  
315 and OSB (23-, 26-, and 13-fold increase in comparison to non-wetted samples, respectively), with  
316 equivalent abundance in mold-free gypsum regardless of wetting. While the concentration of  
317 Fumigaclavine C remained flat or increased slowly in most materials, wet gypsum showed a  
318 dramatic increase in abundance at TP3 and 4 (**Figure S11**).

319  
320 Metabolites that were predictive of material type (OSB, MDF, Gypsum and MF-Gypsum) were  
321 also further analyzed to determine how these materials influence the chemical composition of  
322 metabolites. Of these metabolites, 80% eluted with a retention time of >7 minutes, indicating a  
323 skew toward more hydrophobic compounds. This suggests that hydrophobic compounds are more  
324 diverse between the materials and therefore could have greater influence on microbial metabolism  
325 than the ubiquitous hydrophilic components. Two of these metabolites were identified by MzCloud  
326 search: glucose-phosphate, which was about 10-fold less abundant in MF-gypsum compared to all  
327 other materials, and scopoletin, a metabolite produced by the plants with antimicrobial activity  
328 Lerat *et al.*, 2009, Gnonlonfin *et al.*, 2012, Nascimento *et al.*, 2013), which was about 60-fold more  
329 abundant in MDF samples than in other materials and could be influencing the reduced bacterial  
330 growth on this material (**Figure S11**). Thiabendazole and azoxystrobin, known anti-fungal  
331 compounds (Clausen & Yang, 2007, Balba, 2007), were highly overrepresented on MF-Gypsum,  
332 333 and 595-fold respectively more abundant than the average content for the other three materials,  
333 and as such are likely some of the active compounds in MF-Gypsum.

### 334 *Microbe-metabolite co-occurrences*

335  
336  
337 The abundances of Nigragillin and Fumigaclavine C were each significantly positively correlated  
338 with a fungal OTU annotated to the phylum Ascomycota (corr = 0.66, FDR p = 0.0004), which



339 contains species known to produce such alkaloids. Both Nigragillin and Fumigaclavine C have  
340 been reported to display antibacterial activity (Magdy *et al.*, 2017 & Pinheiro *et al.*, 2013).  
341 Interestingly, Nigragillin was negatively correlated with the abundance of *Bacillus* and  
342 *Pseudomonas* OTUs; this could suggest fungal competition for space and resources (Mille-  
343 Lindblom *et al.*, 2006) against bacteria, and in the specific case of MDF, when Nigragillin  
344 abundance was greatest no bacterial growth was detected (**Figure S2, Figure S11**). The abundance  
345 of glucose-phosphate was significantly correlated to the proportion of a dominant  
346 Enterobacteriaceae OTU, a genus which is known to synthesize it (Herter *et al.*, 2006) (corr = 0.72,  
347 FDR p = 0.000002). Thiabendazole was positively correlated with *Penicillium* abundance (corr =  
348 0.80, FDR p < 10<sup>-9</sup>). As thiabendazole is prevalent and persistent in the natural environment, this  
349 correlation may indicate the presence of thiabendazole-resistant *Penicillium* strains colonizing the  
350 material from the built environment (Holmes & Eckert, 1999).

351  
352 Co-occurrence networks were constructed between the bacterial OTUs and metabolites (SparCC  
353 correlation of >0.4; **Figure S12**) to explore further specific microbe-metabolite associations and  
354 possible mechanistic interactions. Significant correlations were observed between *Bacillus* OTUs  
355 and lipids including fatty acids and monoacylglycerophosphocholine compounds, which are likely  
356 to indicate cell wall and biofilm formation (Diomande *et al.*, 2015, Dubois-Brissonnet *et al.*, 2016).  
357 Interestingly, *Bacillus* OTUs were also positively correlated to other lipid classes including diols  
358 and flavonoids, which have all been observed to interfere with *Pseudomonas* biofilm formation  
359 (Kong *et al.*, 2014; Jensen *et al.*, 2014). In addition, the abundance of two fatty acids, one diol,  
360 and azoxystrobin, were positively correlated with *Bacillus* and negatively correlated with  
361 *Pseudomonas*. Conversely, scopoletin was positively correlated with *Pseudomonas* and negatively  
362 correlated with *Bacillus* (**Figure S13**). These additional antagonistic compound interactions  
363 between *Bacillus* and *Pseudomonas* could represent either competitive interactions between these  
364 organisms or different adaptation to the different materials and wetting conditions.

## 365 **DISCUSSION**

367 As expected, wetted materials had higher bacterial and fungal growth rates and were dominated  
368 by a few particular microbes, most notably the bacterial genera *Bacillus*, *Erwinia*, and  
369 *Pseudomonas* and the fungal genera *Eurotium* and *Penicillium*. This dominance led to an overall  
370 lower alpha diversity compared to non-wetted tiles. Wetting condition and material type described  
371 the majority of the variance in bacterial, fungal and metabolite structure. Interestingly, each wetted  
372 material showed its own unique microbe-metabolite dynamics.

373 Gypsum and MF gypsum were mostly colonized by *Bacillus*, with gypsum being a less selective  
374 environment, which allowed for several bacterial species to thrive on the same coupon  
375 simultaneously, each of them with high relative abundance and apparently sharing both the  
376 physical space and resources. In contrast, MF gypsum prevented most fungal growth and allowed  
377 *Bacillus* to dominate with little competition. MDF selected for fungal growth primarily, which  
378 allowed for the rapid accumulation of the antibacterial chemical, nigragillin, which is known to be  
379 made by the *Aspergillus* fungi. On OSB material, nigragillin and fumigaclavine C, a second  
380 fungal-synthesized antibacterial metabolite, may play important roles in microbial growth  
381 dynamics. Nigragillin, Fumigaclavine C, and *Aspergillus* relative abundance each gradually  
382 increases over time, whereas the abundance of *Pseudomonas* declines after the antibacterial

383 metabolites reach peak abundance, suggesting a dose dependent response (**Figure S11**). These  
384 observations bolster our hypothesis that production of antibacterial metabolites by *Aspergillus* may  
385 inhibit the proliferation of surrounding bacteria. Also, there is a human health risk associated with  
386 the proliferation of the *Aspergillus* fungi in the BE. While the most common species identified in  
387 our data was *Aspergillus penicillioides*, a common indoor fungus in damp buildings with known  
388 associations to allergies and asthma (Edwards *et al.*, 2012, Hay *et al.*, 1992), other *Aspergillus*  
389 species are known to be able to produce mycotoxins (including aflatoxins), molecules that have  
390 been associated with cancer and immunosuppression on humans (Roze *et al.*, 2013).

### 391 *MOLD-RESISTANT GYPSUM*

392  
393 Traditional wood-based building materials contain natural polymers such as cellulose and lignin  
394 that are susceptible to degradation by fungal colonization (Gravesen *et al.*, 1999, Pasanen *et al.*,  
395 1992). With some fungi having been shown to produce mycotoxins including aflatoxins that could  
396 affect human health (Roze *et al.*, 2013, Rand *et al.*, 2017), building materials such as mold-resistant  
397 gypsum have been developed, which contain antifungal compounds intended to discourage fungal  
398 growth. We were particularly interested to examine the microbial communities on these surfaces  
399 and as expected, found that fungal growth was diminished on MF-gypsum compared to other  
400 materials. However, it appeared that the scarcity of fungal colonies made way for bacterial species  
401 to flourish with less competition; on non-wetted materials we observed MF-gypsum bacterial  
402 particle counts greater than on the other three materials, and on wetted materials while the MF-  
403 gypsum bacterial counts were second to MDF, the abundance level between non-wetted and wetted  
404 tiles, unlike MDF, remained minimally changed. This raises the potential that pathogenic bacteria  
405 colonization could occur on MF-gypsum and if wetted could grow and lead to negative health  
406 outcomes. In terms of metabolite production, thiabendazole and azoxystrobin were some of the  
407 anti-fungal compounds found in high abundance and overall a similar subset of compounds  
408 accounted for most of the metabolite abundance on this material, indicating lower metabolic  
409 diversity when the colonization is dominated by bacterial growth. We also detected a correlation  
410 between thiabendazole and *Penicillium*, which suggested the persistence of thiabendazole-resistant  
411 fungal strains.

412

### 413 *DIVERSITY AND INTERACTION BETWEEN MICROBES AND ENVIRONMENT*

414

415 Additionally, certain lipid metabolites (indicative of biofilm formation) showed significant  
416 positive correlation with both *Bacillus* and *Pseudomonas* OTUs, and these lipids were negatively  
417 correlated with the abundance of chloroplast OTUs, indicating that when bacteria and metabolites  
418 indicative of biofilm formation are detected in greater abundance, we see a proportional reduction  
419 in plant-associated signal. Similar to the lipids, metabolites annotated to organic molecules and  
420 vitamins were also negatively correlated with the chloroplast OTUs, which suggests that bacterial  
421 growth, indicated by increased proportion of 16S, cellular counts and associated metabolites, tends  
422 to swamp out the background material-chloroplast signal. We hypothesize that this may be because  
423 these molecules are being produced by bacteria colonizing and forming biofilms on the woody  
424 material. When the relative abundance of the bacteria increases, it reduces our ability to detect  
425 chloroplast sequences (based on a given sequencing depth); as such this negative correlation is  
426 likely due to the increased abundance of the microbes that mediate the production of these

427 metabolites, reducing the detection frequency of specific chloroplast OTUs, and not due to some  
428 mechanistic relationship between the wood and these molecules

429

#### 430 MICROBIAL-METABOLITE INTERACTIONS.

431

432 Pseudomonads and Bacillus are often the main contributors to biofilm formation on material  
433 surfaces in the built environment (Ronan *et al.*, 2013; Powers *et al.*, 2015; Raaijmakers *et al.*,  
434 2010). Biofilms are complex extracellular matrices formed by bacteria through the excretion of  
435 lipopeptide biosurfactants, to provide attachment to a surface to support colocalization with a  
436 nutrient source and protection from dehydration and chemical activity. Some of these lipopeptide  
437 biosurfactants produced by *Pseudomonas* and *Bacillus* species have been shown to have lytic or  
438 growth-inhibitory activity against many microorganisms such as bacteria, viruses, mycoplasmas,  
439 and fungi (Raaijmakers *et al.*, 2010). Powers *et al.* demonstrated that *Pseudomonas protegens*  
440 produces antibiotics that inhibit biofilm formation and sporulation in *Bacillus subtilis*. They also  
441 found that *Pseudomonas putida* secretes an unknown inhibitory compound that prevented biofilm-  
442 associated gene expression. In our study we demonstrate a number of compounds known to have  
443 potential biofilm inhibitory qualities that also co-correlate with either *Pseudomonas* or *Bacillus*  
444 abundance, suggesting potential competitive activity between these organisms. While  
445 *Pseudomonas*–*Bacillus* interactions have been shown to be competitive, interspecies interactions  
446 within the genus *Bacillus* are also important in the formation of biofilms, lipids like hydroxy fatty  
447 acids and mono-acyl-glycerophosphocholines could be building blocks or residual products of the  
448 biofilm creation (Shank *et al.*, 2011, Diomande *et al.*, 2015, Dubois-Brissonnet *et al.*, 2016).

449

450

#### 451 CONCLUSION

452

453 The simultaneous collection of environmental, metabolomic and microbial profiles reveals  
454 insights into the chemical signals that may govern BE microbial communities under high humidity  
455 conditions, as well as providing evidence that these the membership compete for space and  
456 resources. Here we show that wetting condition can profoundly alter both fungal and bacterial  
457 community succession, and that the taxa which dominate samples after wetting or exposure to high  
458 humidity are not abundant in non-wetted materials and have little relation to the skin-associated  
459 taxa which dominate samples of indoor environments. After wetting, the microbial community  
460 undergoes a successional trajectory that can result in similar metabolic diversity even when  
461 taxonomic diversity remains variable. We further show that while material choice significantly  
462 influences bacterial diversity, the same is not true of fungal diversity. In summary, BE microbial  
463 ecology once seen as a wasteland (Gibbons, 2016) could rather be seen as a desert environment  
464 mostly formed with smaller assemblages that can rapidly become an active ecologically dynamic  
465 community if water, in liquid or vapor form, is added. When a material experience high moisture  
466 conditions, both fungal and bacterial growth rapidly accelerate and the metabolites associated with  
467 their adaptation to different surface materials and competition for resources demonstrate ready  
468 made eco-evolutionary adaptation to this sporadic availability of a crucial resource; this  
469 phenomenon is very similar to what has been observed in real desert soil microbiomes (Neilson *et*  
470 *al.*, 2017), as well as in very different ecosystems, such as sediments exposed to oil pollution  
471 (Handley *et al.*, 2017).

## 472 **Methods**

### 473 *Test materials*

474 Four building materials were used in this study: oriented strand board (OSB), medium density  
475 fiberboard (MDF), regular gypsum wallboard, and mold-resistant (i.e., mold-free, or ‘MF’)  
476 gypsum wallboard. All samples were purchased new from a home improvement store in Chicago,  
477 IL. The building materials were cut into 5 cm × 5 cm coupons for testing. The material coupons  
478 were sterilized by UV irradiation for 20 minutes followed by surface cleaning with a 70% ethanol  
479 solution.

### 480 *Inoculation*

481 The building material coupons were naturally inoculated by placing them uncovered on the floor  
482 inside two residences for a period of approximately 50 days each. The goal was to allow for natural  
483 settling of microbes from each indoor environment onto the material surfaces. Another set of test  
484 coupons was covered with aluminum foil and kept in the laboratory for the same duration to be  
485 used as a control group. Each set of test coupons included 44 coupons for each type of building  
486 material (i.e., 176 coupons in total) to allow for multiple subsequent sampling strategies. One set  
487 of test coupons was placed inside a 6<sup>th</sup> floor apartment unit with two adult occupants and a medium  
488 sized dog located in downtown Chicago, IL (Location 1). The other set of materials was placed  
489 inside a 2-story single-family residence without any pets near the main campus of Illinois Institute  
490 of Technology, approximately 8 km south of the downtown residence (Location 2). During the  
491 inoculation periods, built environment metadata (Ramos & Stephens 2014) were collected in each  
492 residence, including temperature (T) and relative humidity (RH) using Onset HOBO U12 data  
493 loggers and occupant presence within ~1 m range of the samples using Onset UX90 data loggers.  
494 Coupons at a third location (the Built Environment Research Laboratory at the of Illinois Institute  
495 of Technology) were covered with aluminum foil to minimize natural inoculation, serving as a  
496 control group.

### 497 *Wetting and incubation*

498 After inoculation, half of each set of materials (i.e., 22 coupons each) from each location, as well  
499 as 22 coupons from the control group, were submerged in sterilized tap water in separate pans for  
500 ~12 hours to simulate the process of wetting of building materials due to a flood or leak. The other  
501 half of each set of materials (i.e., the other 22 coupons each) from each location and the other 22  
502 coupons from the control group were not submerged in water. Next, to encourage fungal growth  
503 on all of the building materials, all of the material coupons were placed in trays (each tray  
504 contained all 22 coupons of one type of material from one location or control group) and were  
505 incubated at room temperature ( $24 \pm 2.7^\circ\text{C}$ ) inside a static airtight chamber ( $0.9 \text{ m} \times 1.2 \text{ m} \times 0.4$   
506  $\text{m}$ ). Salt solutions (potassium nitrate) were used to maintain high RH near ~94% for the duration  
507 of the experiment. Temperature and RH in the chamber were also recorded using Onset HOBO  
508 U12 data loggers.

### 509 *Sampling procedures*

510 The material coupons were sampled for off-line biological and chemical analysis at 7 different

511 sampling time points, referred to here as: TP0, TP1, TP2, TP3, TP4, TP5, and TP6. The initial  
512 samples (TP0) were taken just after retrieving the samples from the field inoculation and represent  
513 non-wetted, naturally inoculated samples previously held at normal residential humidity  
514 conditions. The remaining sampling time points occurred every ~5 days. At each time point, a new  
515 coupon of each material from each condition that had never been swabbed before was swabbed,  
516 while duplicates of previously un-swabbed samples were also swabbed periodically (at TP0, TP2,  
517 TP4, and TP6) for comparison. Two samples ('TP0' and 'TP0 duplicated') were also swabbed at  
518 every time point to investigate whether repeatedly swabbing the surfaces impacted the results.  
519 Duplicates of both previously swabbed and previously un-swabbed samples were also included to  
520 investigate whether or not natural inoculation and subsequent growth was evenly distributed across  
521 multiple coupons. **Figure S1** illustrates the experimental setup and **Figure S14** shows coupons'  
522 photographs at TP5 and TP6 for each one of the three locations. Details of swabbing procedure at  
523 each time point are described below.

524 First, sampling reagents were prepared as follows. Phosphate-buffered saline (PBS) was used for  
525 microbial samples that were to be analyzed for DNA and formaldehyde was used for microbial  
526 samples that were to be analyzed by microscopy. For PBS, 500  $\mu$ l 1X PBS was added to 1.7 ml  
527 microtubes for each sample to be collected. For formaldehyde, 100  $\mu$ l 4% paraformaldehyde was  
528 added to 1.7 ml microtubes for each sample. Microcentrifuge tubes were filled with ethanol  
529 solution (200  $\mu$ l 50% EtOH) to preserve samples for surface chemistry/metabolomics analysis.

530 For subsequent DNA sequencing and analysis, the entire surface of the test coupons was swabbed  
531 using two BD Screw Cap SWUBETM Polyester swabs for approximately 20 sec. The same  
532 researcher swabbed every time to keep the swabbing process consistent. One of the double swabs  
533 was placed into the tube with PBS and frozen for shipping for subsequent sequencing. The tip of  
534 the other of the double swabs was placed into microtubes and the swab tips were vortexed for 10  
535 seconds. 100  $\mu$ L of sample buffer was removed added to the tube containing 100  $\mu$ L 4%  
536 paraformaldehyde for fixation. These fixed samples were stored in a refrigerator at 4°C and then  
537 sent to the San Diego State University team for running numerical counts of cells and virus  
538 particles using microscopy.

539 For surface and microbial chemistry analysis (i.e., metabolomics), another test coupon was  
540 swabbed using a cotton-tipped applicator that is dipped in ethanol (Petras *et al.*, 2016). The end of  
541 the swabs were cut directly into pre-prepared collection tubes, stored at 4°C for 2-3 hours, and then  
542 stored at -20°C overnight. Swabs were then removed with clean forceps the next morning, then re-  
543 sealed into the microcentrifuge tubes and sent to the Northwestern University team on ice at -20°C  
544 or lower. Overhead photos of each tray of coupons were also taken at each time point for image  
545 analysis using ImageJ to calculate the percentage of visible microbial growth coverage (Hoang et  
546 al. 2010).

#### 547 *Viral-like particle and bacterial microscopy counts*

548 Epifluorescence microscopy was used to ensure that all samples contained bacteria and virus-like  
549 particles and to estimate their abundance. 100  $\mu$ L of the paraformaldehyde-fixed samples were  
550 resuspended into 5 mL of sterile 0.02  $\mu$ m filtered water. Each suspended sample was then filtered  
551 onto a 0.02  $\mu$ m Whatman Anodisc filter membrane (Thurber *et al.*, 2009). The filters were stained  
552 with 1X SYBR Gold and incubated for 10 minutes in the dark. Each filter was washed and mounted

553 onto slides to be observed. Visualization was performed using a QImaging Retiga EXi Fast Cooled  
554 Mono 12-bit microscope and Image-Pro Plus software was used to collect digital images and  
555 estimate VLP and bacterial abundances.

#### 556 *Metabolomics analysis*

557 Samples were analyzed by High-Performance Liquid Chromatography and High-Resolution Mass  
558 Spectrometry and Tandem Mass Spectrometry (HPLC-MS/MS). Specifically, the system  
559 consisted of a Thermo Q-Exactive in line with an electrospray source and an Agilent 1200 series  
560 HPLC stack including a binary pump, degasser, and autosampler, outfitted with a column (Waters  
561 XBridge BEH Shield RP18, 100x2.1 mm, 5 $\mu$ m particle size with matching guard). The mobile  
562 phase A was H<sub>2</sub>O with 0.1% Formic Acid; B was Acetonitrile with 0.1% Formic Acid. The  
563 gradient was as follows: 0-0.5 min, 98% A; 5 min, 80% A; 10-10.5 min, 5% A; 10.6-15 min, 98%  
564 A, with a flow rate of 400  $\mu$ L/min. The capillary of the ESI source was set to 275  $^{\circ}$ C, with sheath  
565 gas at 40 arbitrary units and the spray voltage at 4.0 kV. In positive polarity mode, MS1 data was  
566 collected at a resolution of 35,000. The precursor ions were subsequently fragmented using the  
567 higher energy collisional dissociation (HCD) cell set to 30% normalized collision energy in MS2  
568 at a resolution power of 17,500. Data were processed with Compound Discoverer 2.0 (Thermo  
569 Fisher) with MS/MS metabolite identifications made by comparing experimental MS/MS spectra  
570 with library spectra from MZCloud (lower cutoff score of 90% match).

571  
572 For the metabolites that were selected for more in-depth characterization, classification of structure  
573 or substructure was performed by searching databases such as the Dictionary of Natural Products,  
574 the LIPID MAPS Structure Database, and GNPS (Global Natural Products Social Molecular  
575 Networking). Predicted structures resulting from a matched intact mass ( $\leq$ 10 ppm error) were  
576 subsequently validated through manual analysis of fragmentation mass spectra.

577  
578 Metabolite differential abundances (fold calculations) were calculated from Compound Discoverer  
579 median peak areas for each compound including all three sampled locations.

#### 580 581 *DNA extraction and sequencing*

582 To perform DNA extraction, the Qiagen DNeasy Powersoil HTP kit was used with a modified  
583 protocol optimized for low-biomass samples. Swab tips were inserted into each well of the bead  
584 plate, and then cut off using a sterilized wire cutter. The manufacturer's protocol was then  
585 followed, with the following modifications: before cell lysis, the bead plates (containing beads,  
586 bead solution, swabs, and the C1 solution) were heated for 20 minutes at 60 $^{\circ}$ C in a water bath.  
587 Additionally, the protocol steps using solutions C2 and C3 were combined into a single step, by  
588 adding 150  $\mu$ l each of C2 and C3 together to the lysed sample in the 1 ml plate.

589 The DNA obtained from the DNA extraction was used for both high-throughput 16S/ITS  
590 sequencing, and qPCR. The 16S sequencing targeted the V4 region of the bacterial 16S rRNA  
591 gene, using the primer pairs 515F/806R. The ITS sequencing targeted the highly variable fungal  
592 internal transcribed spacer region located between the 5.8S and 18S rRNA genes. Both primer sets  
593 used the same reaction mix and thermocycler instructions: Reaction mix: 9.5  $\mu$ L of molecular  
594 biology grade H<sub>2</sub>O, 12.5  $\mu$ L of Accustart II PCR Toughmix, 1  $\mu$ L each of forward and reverse  
595 primers at 5  $\mu$ M, and 1  $\mu$ L of sample DNA for a total reaction volume of 25  $\mu$ L.

596 To make both the 16S and ITS amplicons, the following PCR program was used: Initial denaturing  
597 step at 94°C for 3 minutes, followed by 35 cycle of: 94°C for 45 seconds, 50°C for 60 seconds,  
598 and 72°C for 90 seconds, followed by a final extension step of 72°C for 10 minutes. The resulting  
599 amplicons were quantified using the Picogreen dsDNA binding fluorescent dye on a Tecan Infinity  
600 M200 Pro plate reader and pooled to 70 ng DNA per sample using the Eppendorf epMotion 5075  
601 liquid handling robot. Primers and PCR reagents were removed using Agencourt AMPure beads,  
602 and then the clean amplicon pool was sequenced at Argonne National Laboratory’s Environmental  
603 Sample Preparation and Sequencing Facility, following the Earth Microbiome Protocol (Caporaso  
604 *et al.*, 2011). Sequencing was performed on an Illumina Miseq using V3 chemistry, generating  
605 2x150nt reads.

606 qPCR was performed using a Roche LightCycler 480 II. The 515F/806R primer pair was used  
607 again for amplification, using a mix of 10 µL Light Cyclor 480 SYBR Green I Master mix, 6 µL  
608 of molecular biology grade H<sub>2</sub>O, 1 µL of 515F primer (10 µM), 1 µL of 806R primer (10 µM),  
609 and 2 µL of template DNA for a total of 20 µL per reaction. The following thermocycler conditions  
610 were used: (1) 95°C for 5 minutes, (2) 95°C for 10 seconds, (3) 45°C for 45 seconds, (4) Measure  
611 fluorescence, with steps 2 through 4 repeated 50 times. To determine the copy number of the 16S  
612 gene (and therefore the number of organisms per swab), a standard curve was generated using a  
613 serial dilution of a plasmid containing the *E. coli* 16S rRNA gene.

#### 614 615 *Treatment of Technical Replicates*

616 We used Mantel test to determine whether the bacterial communities on replicate tiles (tiles on the  
617 same tray sampled at the same time) significantly resembled each other and preserved patterns of  
618 beta-diversity. We began by calculating the Bray-Curtis dissimilarity between each pair of samples  
619 taken from the same tile type using the *beta\_diversity.py* function from the software QIIME 1.9.1  
620 (Caporaso *et al.*, 2010), producing dissimilarity matrices for each sampling type. Then the Mantel  
621 test and false discovery rate adjustment was performed using the *mantel* and *p.adjust* functions in  
622 the Vegan and stats R packages. For all comparisons between the sampling types the mantel  
623 statistic (which measures the stress in the fit of the two matrices) was significantly high (mantel  
624  $\geq 0.67$  for fungi and  $\geq 0.5$  bacteria (all  $p < 1E-05$ ) (**Table S2 (Fungi) and S3 (Bacteria)**). Based  
625 on the highly significant resemblance between tile types, we treated all samples of the same type  
626 as technical replicates, meaning that all combinations of material, location, wetting condition, and  
627 time point had either 2 (time point 0), 3 (time points 1, 3, and 5), or 4 (time points 2, 4, and 6)  
628 replicates.

#### 629 *Rarefaction and statistical analyses*

630 After sequencing and sample merging, bacterial and Fungi OTU tables were rarefied to 1,000 and  
631 10,000 reads respectively for statistical analyses. Rarefaction and statistical analyses were  
632 performed using R.

#### 633 *Random forest analyses*

634 Random forest models were implemented using the “randomForest” R package. Samples from  
635 timepoint 0 were removed from the dataset. Models were built with 1000 trees and 10-fold cross

636 validation. For each of the 10 models for each metadata criterion, a randomly drawn 70% of  
637 samples (100 samples) were used for model training and the remaining 30% (44 samples) were  
638 used for validation.

### 639 *NMDS*

640 We visualized sample similarity using non-metric multi-dimensional scaling (NMDS) ordination  
641 based on Bray-Curtis dissimilarity. Metadata vectors were fit onto the ordination using the *envfit*  
642 command in the Vegan R package. We converted material, location, and wetting condition into  
643 dummy variables (1 = yes, 0 = no) and, in the case of the bacterial and fungal datasets; also fit  
644 vectors of relative abundance for the common genera described in **Figure 3**. We assessed  
645 significance of each of the vectors using  $10^5$  permutations, and removed non-significant vectors  
646 from the figure. The  $R^2$  values for each vector and their significance is presented in **Table S1**

### 647 *Co-occurrence networks*

648 Traditional correlation networks are unsuited to genomic survey data as these data are relative,  
649 rather than absolute, measures of community composition. Since the relative abundances of all  
650 taxa within each sample must sum to 1, the fractions are not independent and will often exhibit  
651 negative correlations to each other regardless of the true correlation in absolute abundance. To  
652 avoid these compositional effects, we generated our networks using SparCC (Friedman & Alm,  
653 2012), a correlation metric based on log-ratio transformed data that is specifically suited to  
654 compositional genomic surveys. Pseudo-p values for each correlation were generated through  
655 comparison from 100 to 1,000 bootstraps of the permuted OTU table.

656 For the same kingdom and microbe-metabolite networks only samples where either bacteria or  
657 fungi and metabolites were found in detectable levels after rarefaction were used (N=83, N= 91  
658 respectively). Additionally, only bacterial OTUs with >9 reads, fungi OTUs with >99 reads, and  
659 metabolites with > 5'000,000 abundance in the rarified dataset were used for a total number of 630  
660 bacterial OTUs, 352 fungi OTUs and 426 metabolites. Figures were generated using CAVNet R  
661 package (Cardona, 2017) and only displayed the higher correlation threshold (positive or negative)  
662 greater than 0.4.

663 For the network encompassing both bacteria and fungi, the OTUs reads threshold remained the  
664 same but only samples with both 16S and ITS data were kept (N = 153) producing a new subset  
665 of bacterial and fungi OTUs, 590 and 581 OTUs respectively. This dataset produced a co-  
666 occurrence network with 1,171 nodes. Only positive correlations with a pseudo-p < 0.05 were  
667 included, resulting in a network with 33,509 edges (density = 0.052). The network was ordinated  
668 using the Fruchterman-Reingold Algorithm (edge-weighted, force-directed) in the *igraph* R  
669 package, with node size based on the log read count of each OTU across all samples (with ITS  
670 counts first divided by 10 to equalize rarefaction depth between datasets). We used the Walktrap  
671 method (Pons & Latapy, 2005) to uncover dense subgraphs (modules) within the network, which  
672 may correspond to distinct community structures. We chose Walktrap (which is based on random  
673 walks within the network) as our method of community inference due to its computational  
674 tractability and its accuracy at uncovering subgraphs regardless of network size (Yang *et al.*, 2016).  
675 We used random walks of four steps, which resulted in four distinct modules with a network  
676 modularity of 0.45



677

## REFERENCES

- 678 Adams, Rachel I., et al. "Ten questions concerning the microbiomes of buildings." *Building and Environment* 109  
679 (2016): 224-234.
- 680
- 681 Adams, Rachel I., et al. "Dispersal in microbes: fungi in indoor air are dominated by outdoor air and show dispersal  
682 limitation at short distances." *The ISME journal* 7.7 (2013): 1262.
- 683
- 684 Balba, Hamdy. "Review of strobilurin fungicide chemicals." *Journal of Environmental Science and Health Part*  
685 *B* 42.4 (2007): 441-451.
- 686
- 687 Caporaso, J. Gregory, et al. "Global patterns of 16S rRNA diversity at a depth of millions of sequences per  
688 sample." *Proceedings of the national academy of sciences* 108. Supplement 1 (2011): 4516-4522.
- 689
- 690 Caporaso, J. Gregory, et al. "QIIME allows analysis of high-throughput community sequencing data." *Nature*  
691 *methods* 7.5 (2010): 335.
- 692
- 693 Cardona C. 2017. CAVNet: Creation Analysis and Visualization of Networks Package. Bitbucket.  
694 <https://bitbucket.org/JackGilbertLab/cavnet>
- 695
- 696 Chase, John, et al. "Geography and location are the primary drivers of office microbiome  
697 composition." *MSystems* 1.2 (2016): e00022-16.
- 698
- 699 Clausen, Carol A., and Vina Yang. "Protecting wood from mould, decay, and termites with multi-component  
700 biocide systems." *International Biodeterioration & Biodegradation* 59.1 (2007): 20-24.
- 701
- 702 Cole, Richard J., et al. "Mycotoxins produced by *Aspergillus fumigatus* species isolated from molded  
703 silage." *Journal of Agricultural and Food Chemistry* 25.4 (1977): 826-830.
- 704
- 705 Coombs, Kanistha, et al. "Fungal microbiomes associated with green and non-green building  
706 materials." *International biodeterioration & biodegradation* 125 (2017): 251-257.
- 707
- 708 Dannemiller, Karen C., et al. "Combining real-time PCR and next-generation DNA sequencing to provide  
709 quantitative comparisons of fungal aerosol populations." *Atmospheric environment* 84 (2014): 113-121.
- 710
- 711 Diomande, Sara Esther, et al. "Role of fatty acids in *Bacillus* environmental adaptation." *Frontiers in microbiology* 6  
712 (2015): 813.
- 713
- 714 Dubois-Brissonnet, Florence, Elsa Trotier, and Romain Briandet. "The biofilm lifestyle involves an increase in  
715 bacterial membrane saturated fatty acids." *Frontiers in microbiology* 7 (2016): 1673.
- 716
- 717 Edwards, Michael R., et al. "The microbiology of asthma." *Nature Reviews Microbiology* 10.7 (2012): 459.
- 718
- 719 Fisk, William J., Ekaterina A. Eliseeva, and Mark J. Mendell. "Association of residential dampness and mold with  
720 respiratory tract infections and bronchitis: a meta-analysis." *Environmental Health* 9.1 (2010): 72.
- 721
- 722 Friedman, Jonathan, and Eric J. Alm. "Inferring correlation networks from genomic survey data." *PLoS*  
723 *computational biology* 8.9 (2012): e1002687.
- 724
- 725 Gibbons, Sean M., et al. "Ecological succession and viability of human-associated microbiota on restroom  
726 surfaces." *Applied and environmental microbiology* 81.2 (2015): 765-773.
- 727
- 728 Gibbons, Sean M. "The built environment is a microbial wasteland." *MSystems* 1.2 (2016): e00033-16.

- 729  
730 Gnonlonfin, GJ Benoit, Ambaliou Sanni, and Leon Brimer. "Review scopoletin—a coumarin phytoalexin with  
731 medicinal properties." *Critical Reviews in Plant Sciences* 31.1 (2012): 47-56.  
732 Gravesen, Suzanne, et al. "Microfungal contamination of damp buildings--examples of risk constructions and risk  
733 materials." *Environmental Health Perspectives* 107.Suppl 3 (1999): 505.  
734  
735 Handley, Kim M., et al. "Metabolic and spatio-taxonomic response of uncultivated seafloor bacteria following the  
736 Deepwater Horizon oil spill." *The ISME journal* 11.11 (2017): 2569.  
737  
738 Hay, D. B., B. J. Hart, and A. E. Douglas. "Evidence refuting the contribution of the fungus *Aspergillus*  
739 *penicillioides* to the allergenicity of the house dust mite *Dermatophagoides pteronyssinus*." *International archives of*  
740 *allergy and immunology* 97.1 (1992): 86-88.  
741  
742 Hegarty, Bridget, K. C. Dannemiller, and Jordan Peccia. "Gene expression of indoor fungal communities under  
743 damp building conditions: Implications for human health." *Indoor air* (2018).  
744  
745 Herter, T., et al. "Glucose-1-phosphatase (AgpE) from *Enterobacter cloacae* displays enhanced phytase  
746 activity." *Applied microbiology and biotechnology* 70.1 (2006): 60-64.  
747  
748 Hoang, Chi P., et al. "Resistance of green building materials to fungal growth." *International Biodeterioration &*  
749 *Biodegradation* 64.2 (2010): 104-113.  
750  
751 Holmes, Gerald J., and Joseph W. Eckert. "Sensitivity of *Penicillium digitatum* and *P. italicum* to postharvest citrus  
752 fungicides in California." *Phytopathology* 89.9 (1999): 716-721.  
753  
754 Hyvärinen, Anne, et al. "Fungi and actinobacteria in moisture-damaged building materials—concentrations and  
755 diversity." *International Biodeterioration & Biodegradation* 49.1 (2002): 27-37.  
756  
757 IAQ Report - Prevalence of Building Dampness Available at: <https://iaqscience.lbl.gov/dampness-prevalence>.  
758  
759 IAQ Report - Nature and Causes of Building Dampness Available at: <https://iaqscience.lbl.gov/dampness-nature>.  
760  
761 Institute of Medicine (US) Committee on Damp Indoor Spaces and Health. *Damp Indoor Spaces and Health*.  
762 Washington (DC): National Academies Press (US); 2004. Available from:  
763 <https://www.ncbi.nlm.nih.gov/books/NBK215643/doi:10.17226/11011>  
764  
765 Isogai, Akira, et al. "Isolation and identification of Nigragillin as a insecticidal metabolite produced by a *Aspergillus*  
766 *niger*." *Agricultural and Biological Chemistry* 39.3 (1975): 739-740.  
767  
768 Jaakkola, Maritta S., et al. "Association of indoor dampness and molds with rhinitis risk: a systematic review and  
769 meta-analysis." *Journal of Allergy and Clinical Immunology* 132.5 (2013): 1099-1110.  
770  
771 Jensen, Peter Ø., et al. "Formation of hydroxyl radicals contributes to the bactericidal activity of ciprofloxacin  
772 against *Pseudomonas aeruginosa* biofilms." *Pathogens and disease* 70.3 (2014): 440-443.  
773  
774 Johansson, Pernilla, et al. "Laboratory study to determine the critical moisture level for mould growth on building  
775 materials." *International Biodeterioration & Biodegradation* 73 (2012): 23-32.  
776  
777 Kong, Na-Na, et al. "Flavonoids from the halophyte *Apocynum venetum* and their antifouling activities against  
778 marine biofilm-derived bacteria." *Natural product research* 28.12 (2014): 928-931.  
779  
780 Lax, Simon, et al. "Longitudinal analysis of microbial interaction between humans and the indoor  
781 environment." *Science* 345.6200 (2014): 1048-1052.  
782  
783 Lax, Simon, et al. "Bacterial colonization and succession in a newly opened hospital." *Science translational*  
784 *medicine* 9.391 (2017): eaah6500.

- 785  
786 Lerat, Sylvain, et al. "Streptomyces scabiei and its toxin thaxtomin A induce scopoletin biosynthesis in tobacco and  
787 Arabidopsis thaliana." *Plant cell reports* 28.12 (2009): 1895-1903.  
788  
789 Magdy, Wesam, et al. "Nigragillin, Nigerazine B and Five Naphtho- $\gamma$ -pyrones from *Aspergillus japonicus* Isolated  
790 from Hot Desert Soil." *The Natural Products Journal* 7.3 (2017): 216-223.  
791 Mendell, Mark J., et al. "Respiratory and allergic health effects of dampness, mold, and dampness-related agents: a  
792 review of the epidemiologic evidence." *Environmental health perspectives* 119.6 (2011): 748.  
793  
794 Mille-Lindblom, Cecilia, Helmut Fischer, and Lars J. Tranvik. "Antagonism between bacteria and fungi: substrate  
795 competition and a possible tradeoff between fungal growth and tolerance towards bacteria." *Oikos* 113.2 (2006):  
796 233-242.  
797  
798 Miller, J. David, and David R. McMullin. "Fungal secondary metabolites as harmful indoor air contaminants: 10  
799 years on." *Applied microbiology and biotechnology* 98.24 (2014): 9953-9966.  
800  
801 Nascimento, M. S., et al. "Phenolic extractives and natural resistance of wood." *Biodegradation-Life of Science*.  
802 InTech, 2013.  
803  
804 Neilson, Julia W., et al. "Significant Impacts of Increasing Aridity on the Arid Soil Microbiome." *MSystems* 2.3  
805 (2017): e00195-16.  
806  
807 Pasanen, A-L., et al. "Occurrence and moisture requirements of microbial growth in building  
808 materials." *International Biodeterioration & Biodegradation* 30.4 (1992): 273-283.  
809  
810 Petras, Daniel, et al. "Mass spectrometry-based visualization of molecules associated with human  
811 habitats." *Analytical chemistry* 88.22 (2016): 10775-10784.  
812  
813 Pinheiro, Eduardo Antonio A., et al. "Antibacterial activity of alkaloids produced by endophytic fungus *Aspergillus*  
814 sp. EJC08 isolated from medical plant *Bauhinia guianensis*." *Natural product research* 27.18 (2013): 1633-1638.  
815  
816 Pons, Pascal, and Matthieu Latapy. "Computing communities in large networks using random walks." *International*  
817 *symposium on computer and information sciences*. Springer, Berlin, Heidelberg, 2005.  
818  
819 Powers, Matthew J., et al. "Inhibition of cell differentiation in *Bacillus subtilis* by *Pseudomonas protegens*." *Journal*  
820 *of bacteriology* (2015): JB-02535.  
821  
822 Quansah, Reginald, et al. "Residential dampness and molds and the risk of developing asthma: a systematic review  
823 and meta-analysis." *PloS one* 7.11 (2012): e47526.  
824  
825 Raaijmakers, Jos M., et al. "Natural functions of lipopeptides from *Bacillus* and *Pseudomonas*: more than surfactants  
826 and antibiotics." *FEMS microbiology reviews* 34.6 (2010): 1037-1062.  
827  
828 Rand, Thomas G., et al. "Inflammation-associated gene expression in RAW 264.7 macrophages induced by toxins  
829 from fungi common on damp building materials." *Toxicology in Vitro* 43 (2017): 16-20.  
830  
831 Ronan, Evan, et al. "Interspecies interaction extends bacterial survival at solid-air interfaces." *Biofouling* 29.9  
832 (2013): 1087-1096.  
833  
834 Roze, Ludmila V., Sung-Yong Hong, and John E. Linz. "Aflatoxin biosynthesis: current frontiers." *Annual review of*  
835 *food science and technology* 4 (2013): 293-311  
836  
837 Shank, Elizabeth A., et al. "Interspecies interactions that result in *Bacillus subtilis* forming biofilms are mediated  
838 mainly by members of its own genus." *Proceedings of the National Academy of Sciences* (2011): 201103630.  
839

840 Stephens, Brent. "What have we learned about the microbiomes of indoor environments?." *MSystems* 1.4 (2016):  
841 e00083-16.

842

843 Thurber, Rebecca V., et al. "Laboratory procedures to generate viral metagenomes." *Nature protocols* 4.4 (2009):  
844 470.

845

846 Viitanen, Hannu, et al. "Moisture and bio-deterioration risk of building materials and structures." *Journal of*  
847 *Building Physics* 33.3 (2010): 201-224.

848

849 Yang, Zhao, René Algesheimer, and Claudio J. Tessone. "A comparative analysis of community detection  
850 algorithms on artificial networks." *Scientific Reports* 6 (2016): 30750.

851

## 852 FIGURES

853

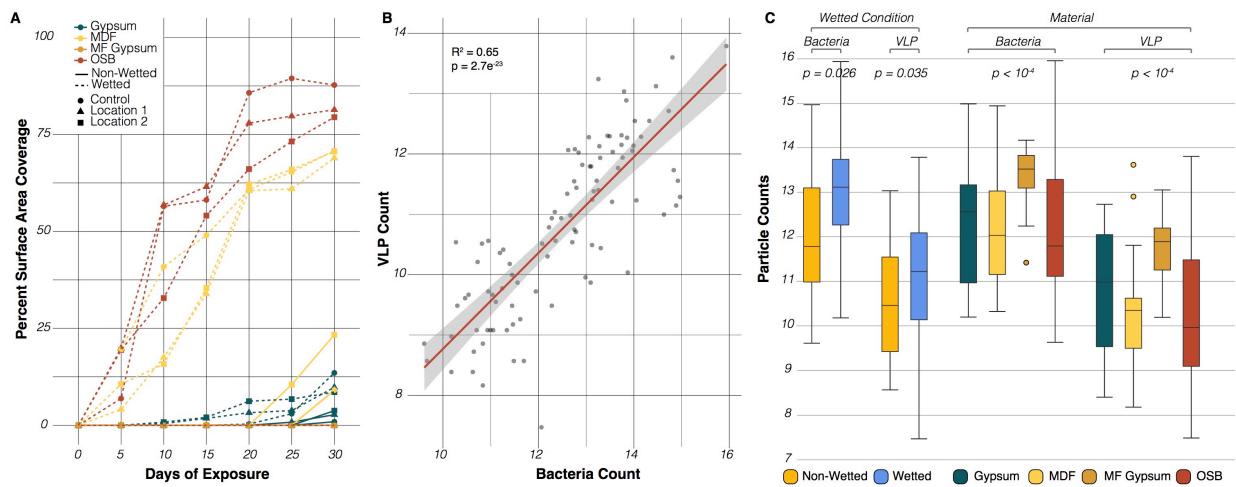

854

855 **Figure 1: Microbial growth rates vary across sample types.** (A) Percent of surface area covered  
856 by visible microbial growth through time (n=168, 4 materials, 3 locations, 2 wetting conditions, 7  
857 time points). Color indicates tile material, point shape indicates inoculating location, and line type  
858 indicates whether the tile was wet before incubation. (B) Correlation in the counts of bacteria-like  
859 (BLP) and viral-like particles (VLP) across all tiles (n=96 samples, 4 materials, 3 locations, 2  
860 wetting conditions, 4 time points). (C) Boxplots of BLP and VLP counts by wetting condition and  
861 by material (n=96 samples).

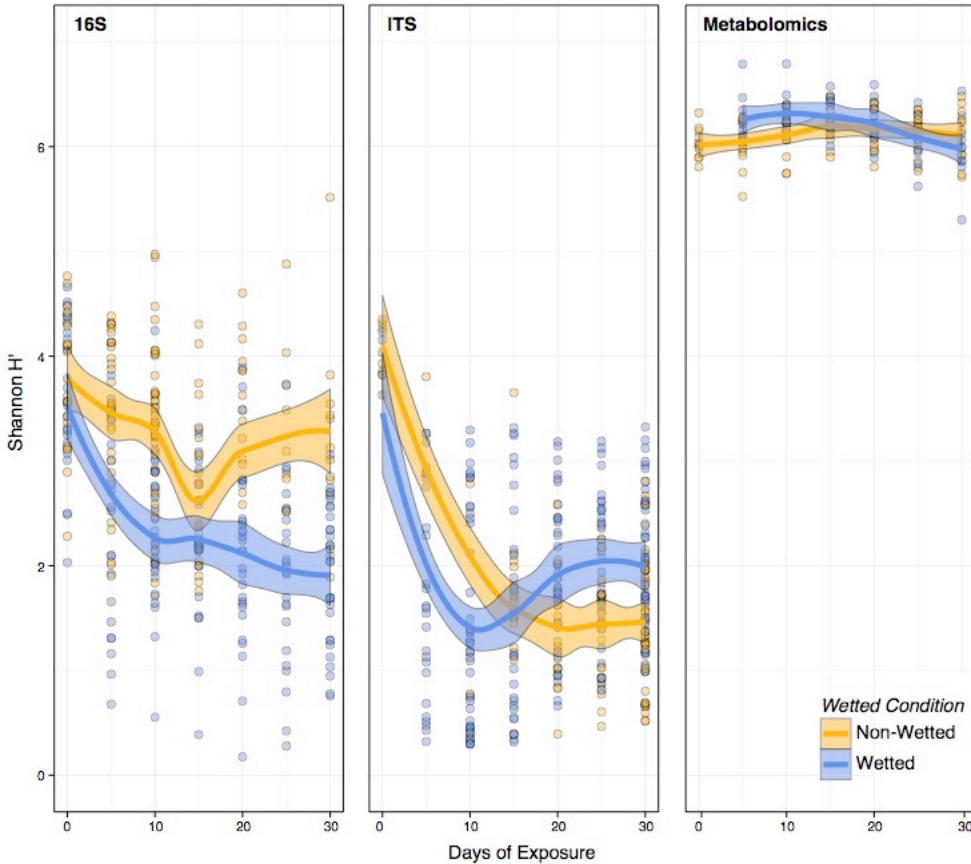

862  
863 **Figure 2: Change in the Shannon Index of samples over time.** Points represent individual  
864 samples and the trend lines are a smoothed moving-average of the mean and shaded regions  
865 indicate the standard error (n=338, 330 and 144 samples for 16S, ITS and Metabolomics,  
866 respectively)

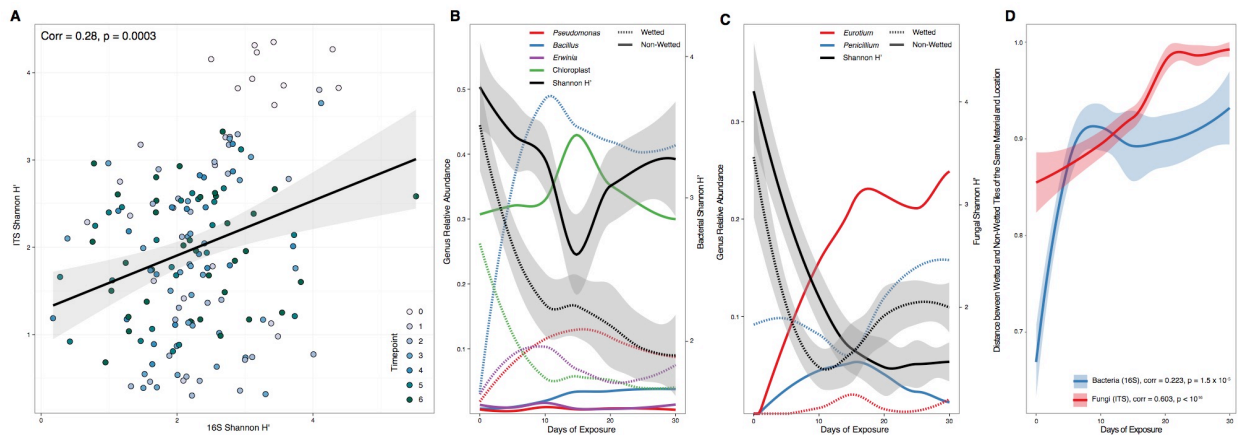

867 **Figure 3: Overview of community succession.** (A) Fungal diversity and bacterial diversity are  
868 significantly correlated across communities (n=153 samples). Points represent individual  
869 samples, colored by the time point at which the sample was taken. (B) Changes in the relative abundance  
870 of selected bacterial genera over the course of succession (n=338 samples). Lines represent a  
871 smoothed moving average of the mean. Genus is indicated by color and wetting condition is

872 indicted by line style. Average community diversity (Shannon H' at OTU level, as in Figure 3) is  
 873 indicated by black lines with standard error indicated by the gray shaded region. Genus abundance  
 874 is indicated on the left y-axis and Shannon H' is indicated on the right y-axis. (C) Changes in the  
 875 relative abundance of selected fungal genera over the course of succession (n=330 samples).  
 876 Formatting is as in (B). (D) Wet vs. non-wetted replicates of tiles of the same material and  
 877 inoculating location become increasingly dissimilar over the course of community succession  
 878 (n=338, 330 samples for 16S and ITS, respectively). The y-axis is the Bray-Curtis distance  
 879 between replicates. Spearman correlation between community dissimilarity and time is indicated  
 880 in the legend error

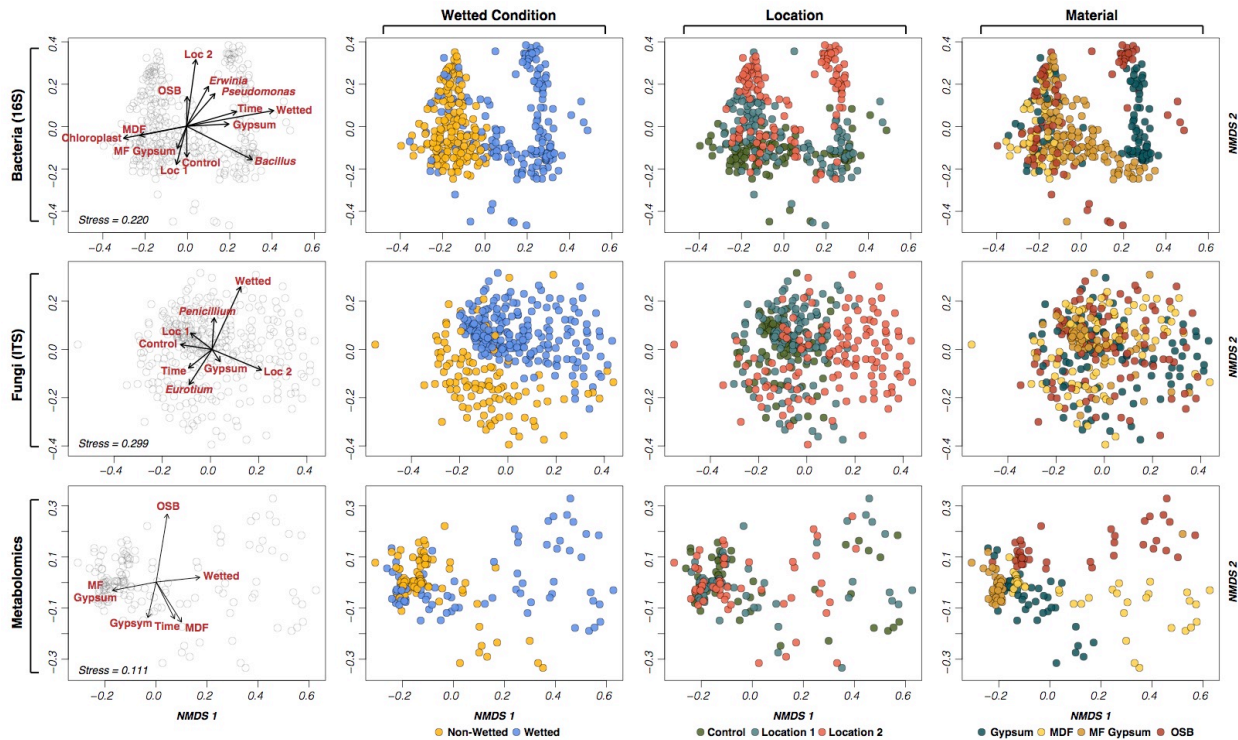

881 **Figure 4: NMDS plots illustrate clustering of sample diversity by sample type.** Each row  
 882 comprises four identical NMDS plots (n=338, 330 and 144 samples for 16S, ITS and  
 883 Metabolomics, respectively). The leftmost plot illustrates the ordination's association with  
 884 environmental variables and the remaining plots color sample points by various metadata factors.  
 885 The stress on the NMDS plot is indicated in the rightmost plot in each row error

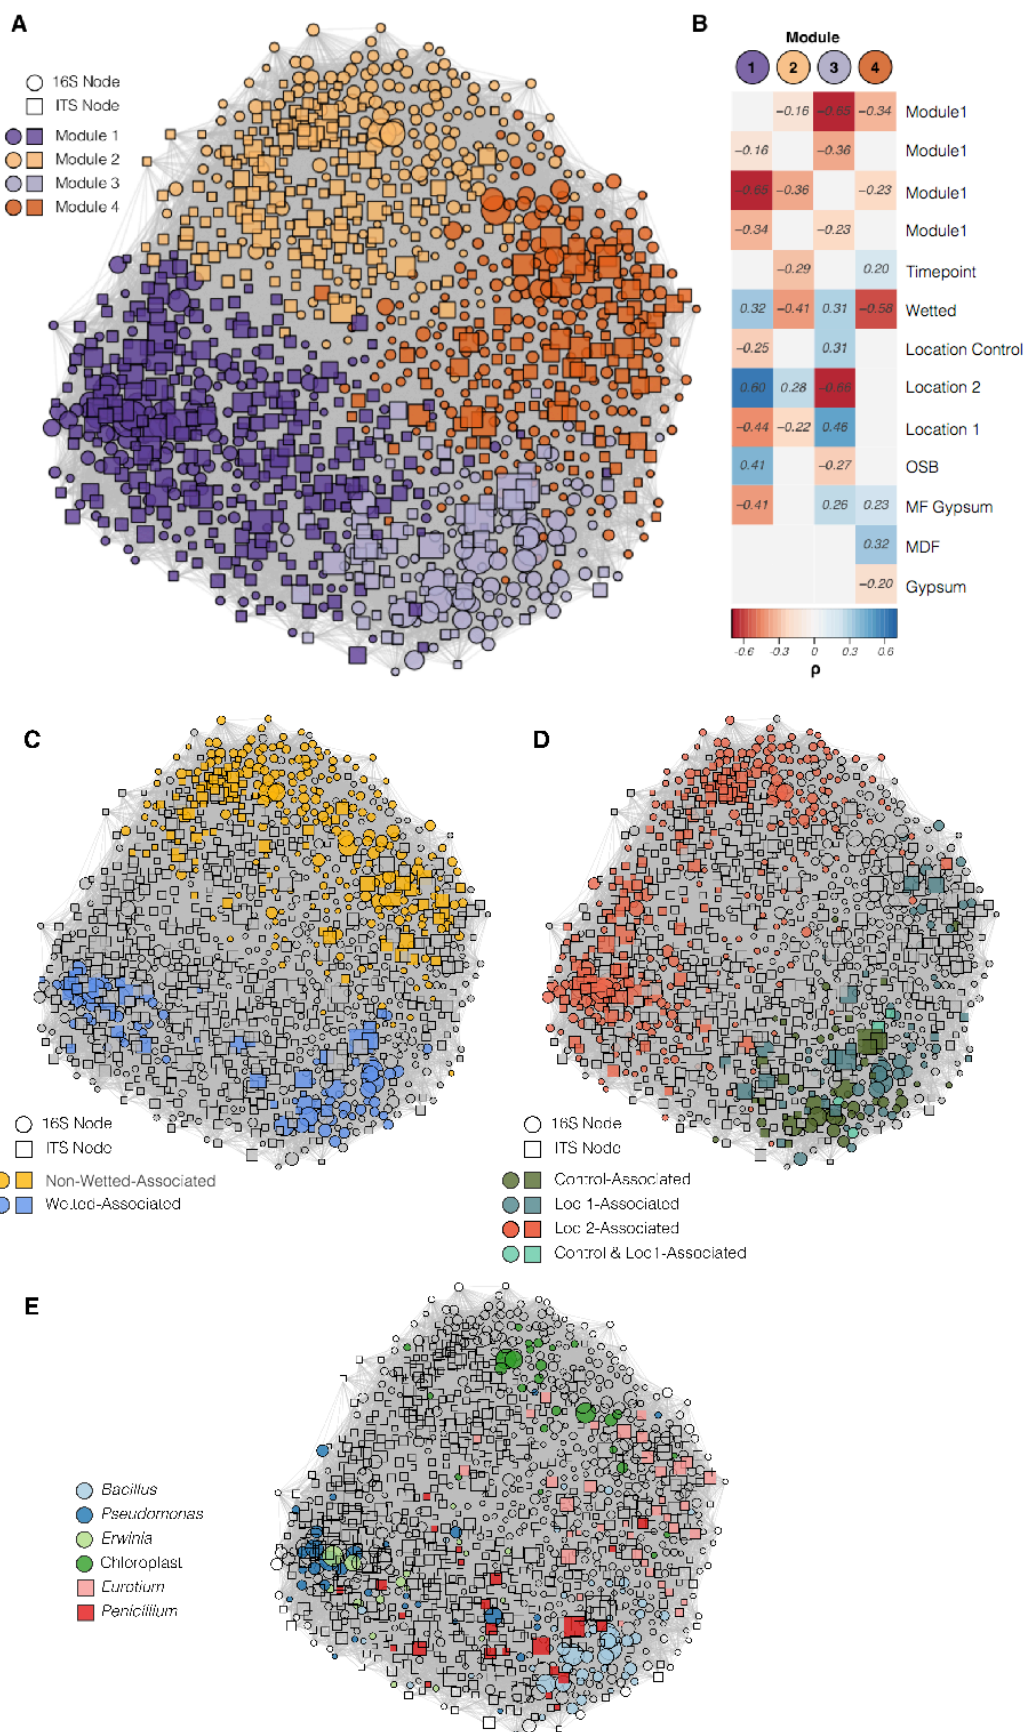

886 **Figure 5: Network of SparCC OTU correlations.** (A) Edge-weighted, spring-embedded  
 887 network ordination, with nodes colored by module membership. Node shape represents node type  
 888 (16S or ITS) and node size is based on the log-transformed abundance of each node (n=153 with  
 889 both 16S and ITS, respectively). (B) Correlations between metadata factors (treated as dummy  
 890 variables where true = 1 and false = 0) and the percent of reads in network modules. Non-  
 891 significant correlations are not shown. (C) Taxa enriched in wet or non-wetted samples, as  
 892 determined through a two-sided non-parametric t-test with  $10^5$  permutations. (D) Taxa enriched in  
 893 samples originating from an individual inoculating location, with statistical methods as in (A). (E)  
 894 Taxonomy of nodes in the genera included in Figure 4.

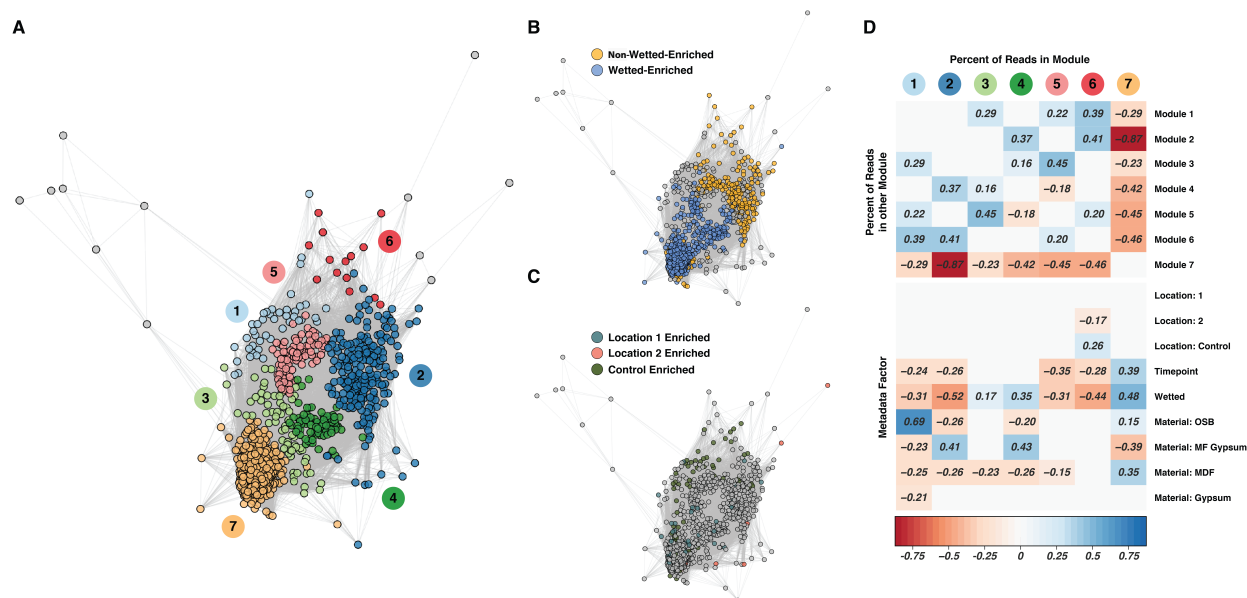

895 **Figure 6: Metabolite co-occurrence network.** (A) Network of significantly positive spearman  
 896 correlations between metabolites, with network module indicated by color (n=144 samples). (B)  
 897 Metabolites enriched in wet or non-wetted samples, as determined through a two-sided non-  
 898 parametric t-test with  $10^5$  permutations. (C) Metabolites enriched in samples originating from an  
 899 individual inoculating location, with statistical methods as in (B). (D) Correlations between  
 900 metadata factors (treated as dummy variables where true = 1 and false = 0) and the percent of  
 901 metabolites in network modules. Non-significant correlations are not shown.



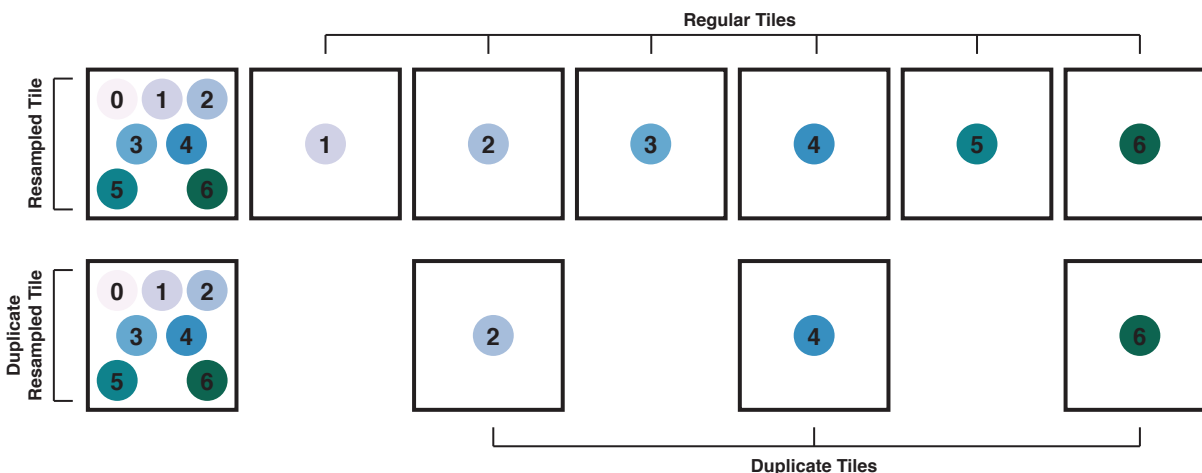

902 **Figure S1: Experimental setup of project.** Illustration of the experimental setup and coupon  
 903 sampling procedures.

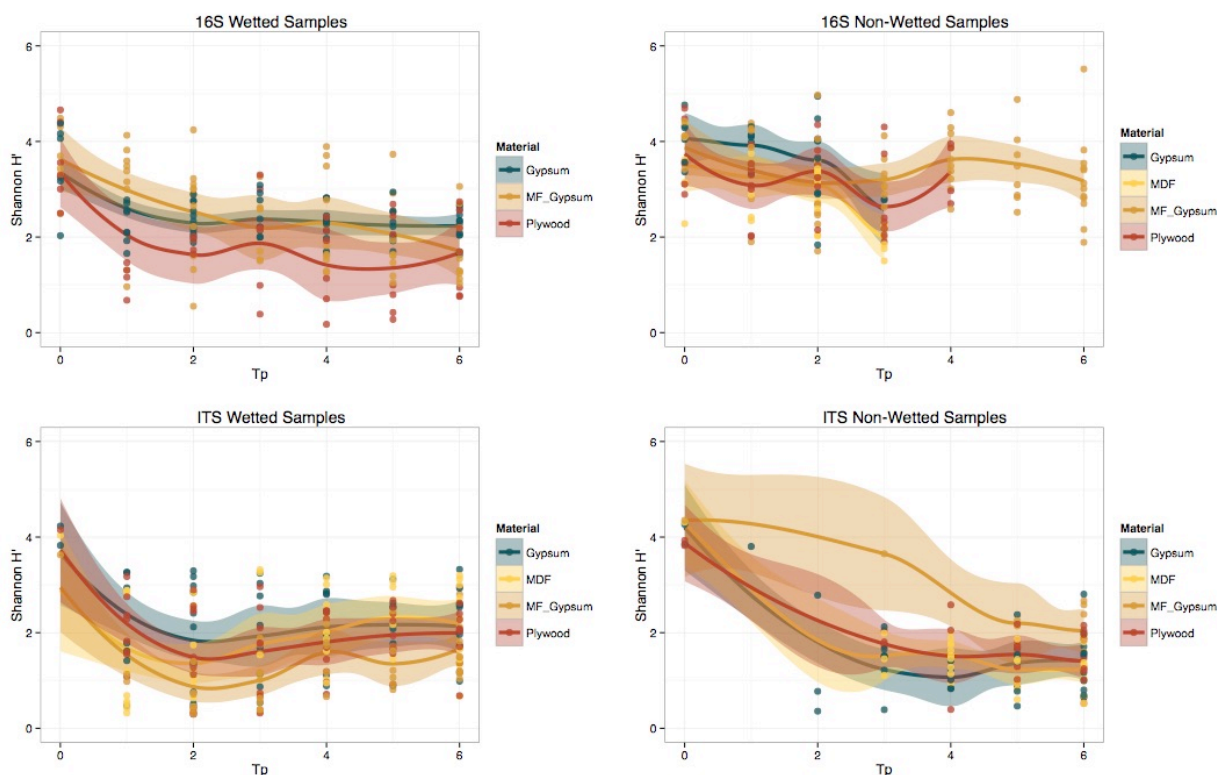

904 **Figure S2: Change in the Shannon Index by material over time.** Points represent individual  
 905 samples ( $n=338$ , 330 samples for 16S and ITS, respectively) and the trend lines are a smoothed  
 906 moving-average of the mean and shaded regions indicate the standard error  
 907

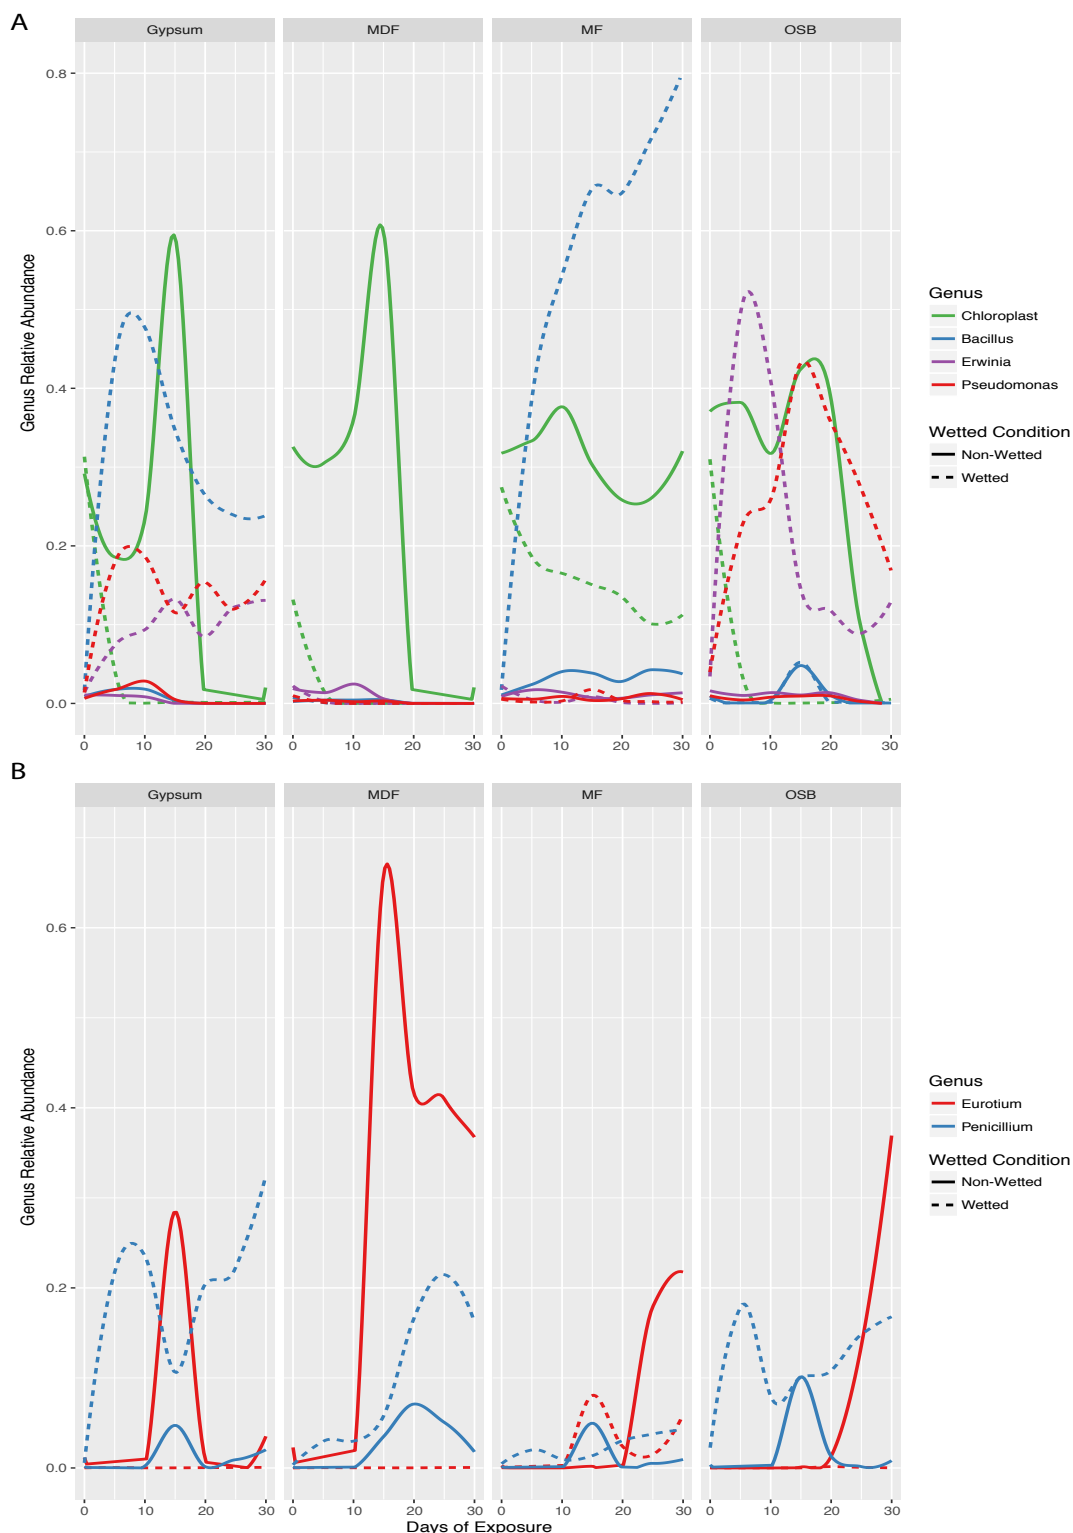

908  
909  
910  
911

**Figure S3: Microbial succession by material over time** Changes in the relative abundance of selected microbial genera for each material over the course of succession. (n=338, 330 samples for 16S and ITS, respectively). (A) Lines represent a smoothed moving average of the mean. Genus

912 is indicated by color and wetting condition is indicated by line style. **(B)** Changes in the relative  
913 abundance of selected fungal genera over the course of succession. Formatting is as in **(A)**  
914  
915

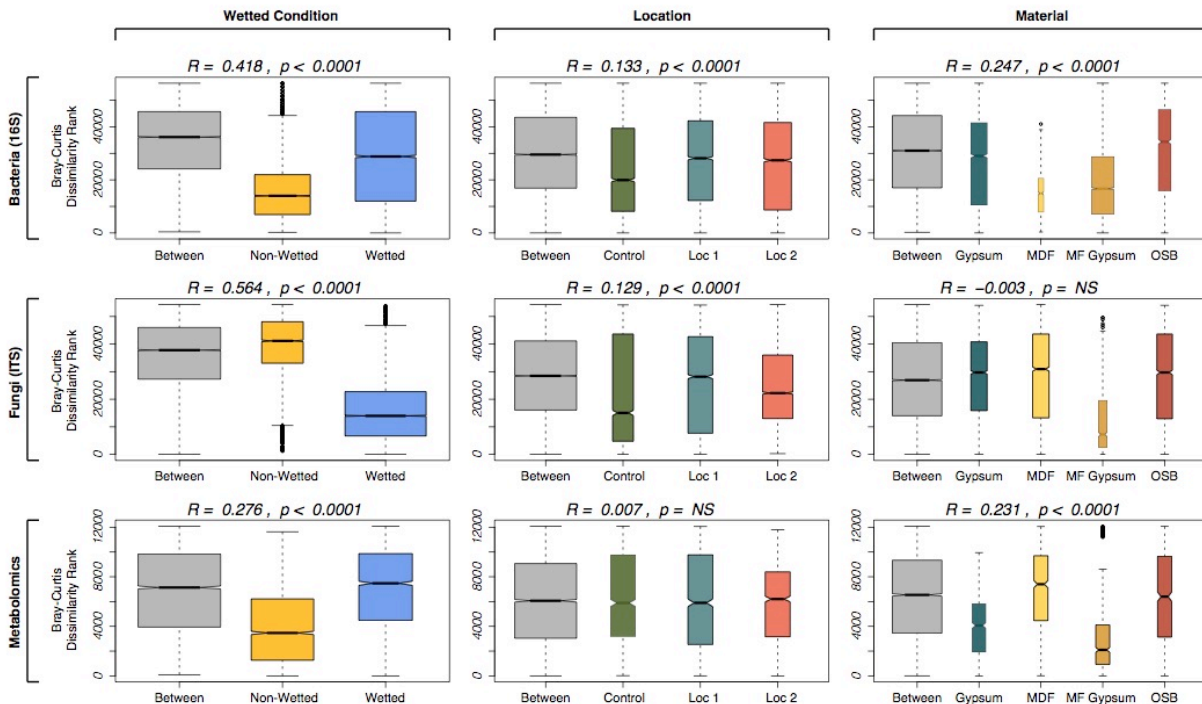

916 **Figure S4: ANOSIM quantifies the influence of metadata factors on the dissimilarity**  
917 **between samples.** Columns represent different metadata factors and rows represent the three  
918 datasets in this study (n=338, 330 samples for 16S and ITS, respectively). Boxplots depict the  
919 range of ranked Bray-Curtis dissimilarities within and between factors (lower rank = lower  
920 dissimilarity). Boxplot width indicates the number of samples represented by the boxplot  
921

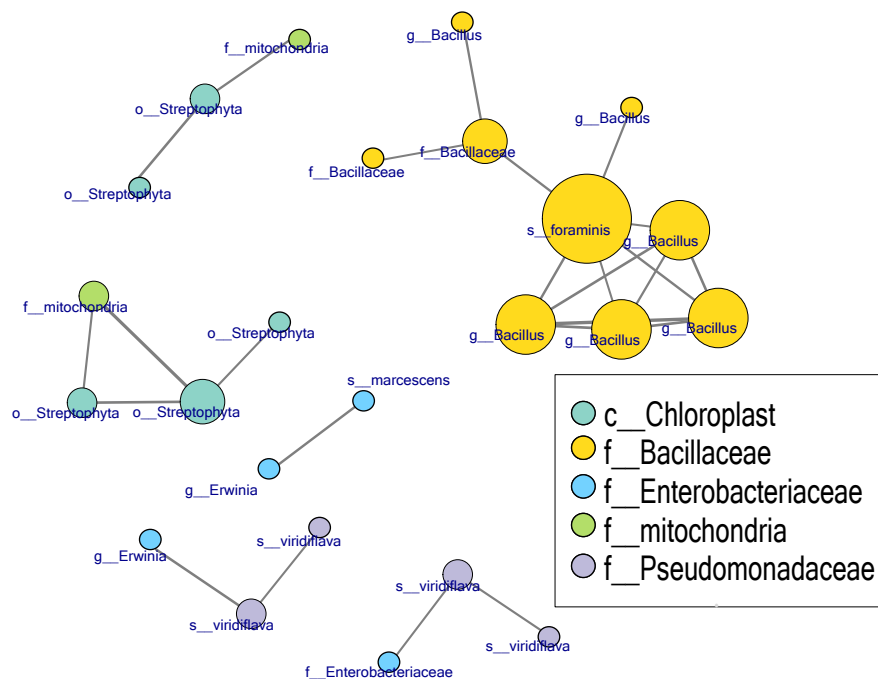

922 **Figure S5: Bacteria-Bacteria co-occurrence network.** Co-occurrence network (from n=83  
923 bacteria samples) shows highly correlated bacteria form monophyletic clusters for samples  
924 containing more abundant taxa  
925

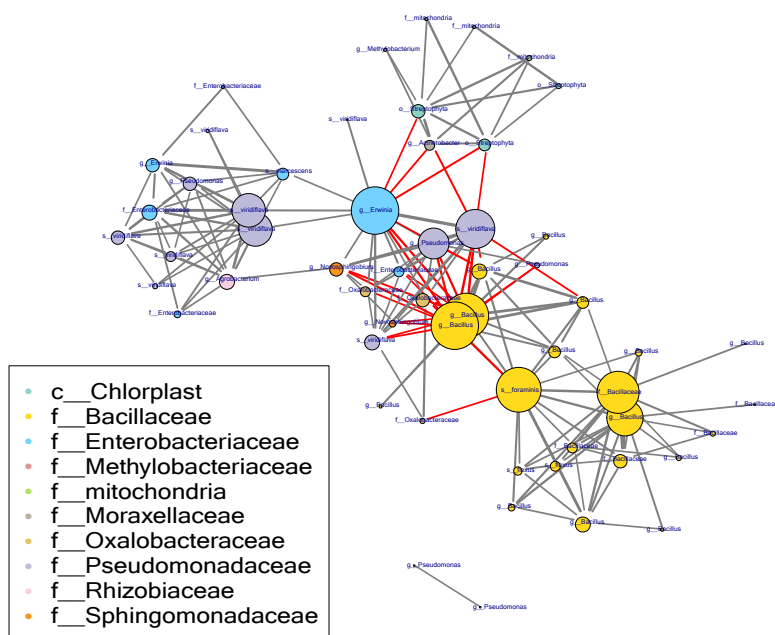

926  
 927 **Figure S6: Bacteria-Bacteria co-occurrence network on wet samples.** Co-occurrence network  
 928 (from n=39 wet samples) shows how *Pseudomonas* and *Bacillus* are anticorrelated on wet samples  
 929 for samples containing more abundant taxa  
 930  
 931

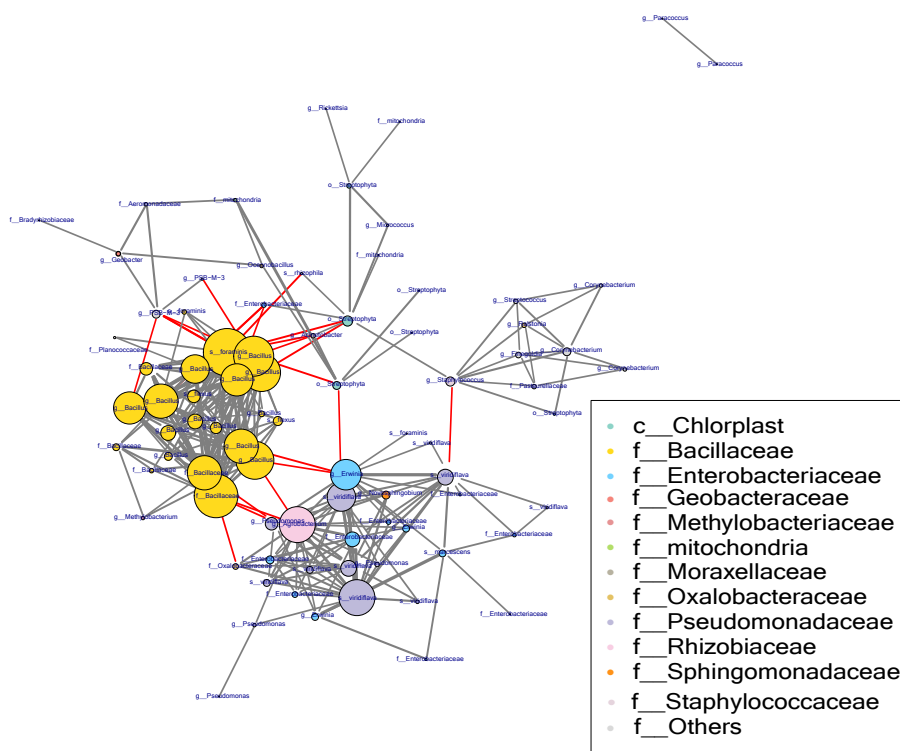

932

933 **Figure S7: Bacteria-Bacteria co-occurrence network on gypsum samples.** Co-occurrence  
934 network (from n=24 gypsum samples) shows how *Pseudomonas* and *Bacillus* are anticorrelated  
935 on all gypsum samples

936

937

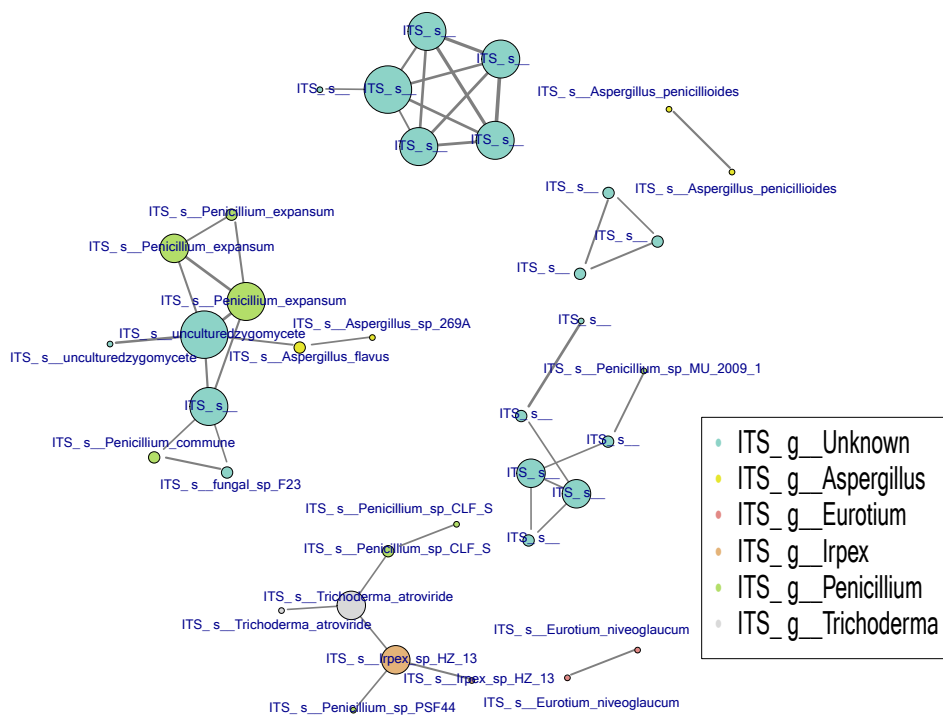

938  
939  
940  
941  
942  
943

**Figure S8: Fungi-Fungi co-occurrence network.** Co-occurrence network (from n=91 fungi samples) shows highly correlated fungi forms mostly monophyletic clusters

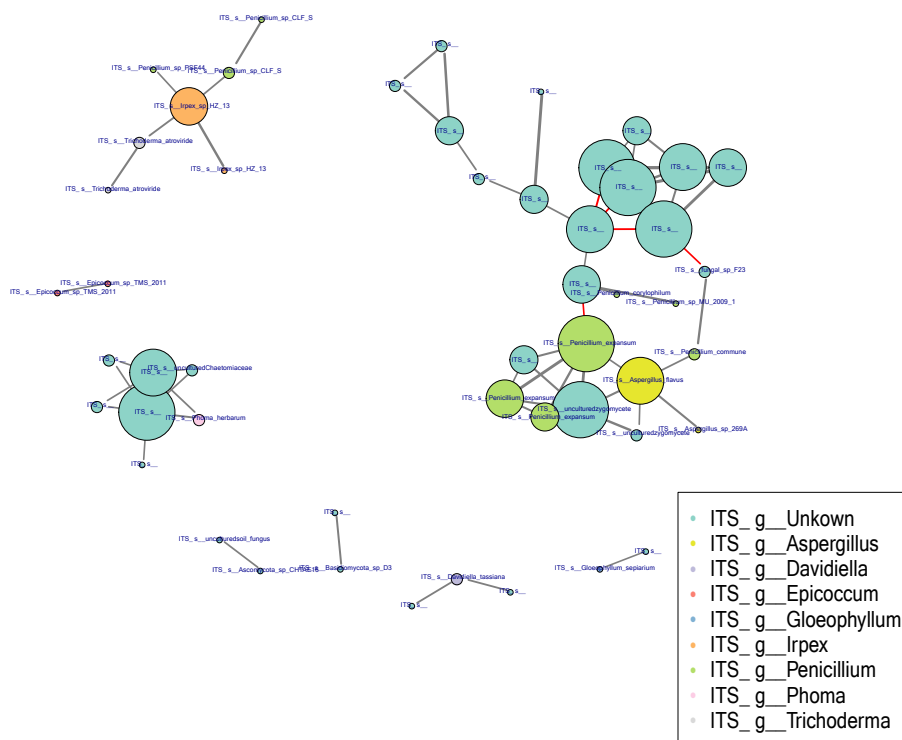

944  
945  
946  
947

**Figure S9: Fungi-Fungi co-occurrence network on wet samples.** Co-occurrence network (from n=58 wet samples) shows how certain Fungi OTUs are anticorrelated on wet samples



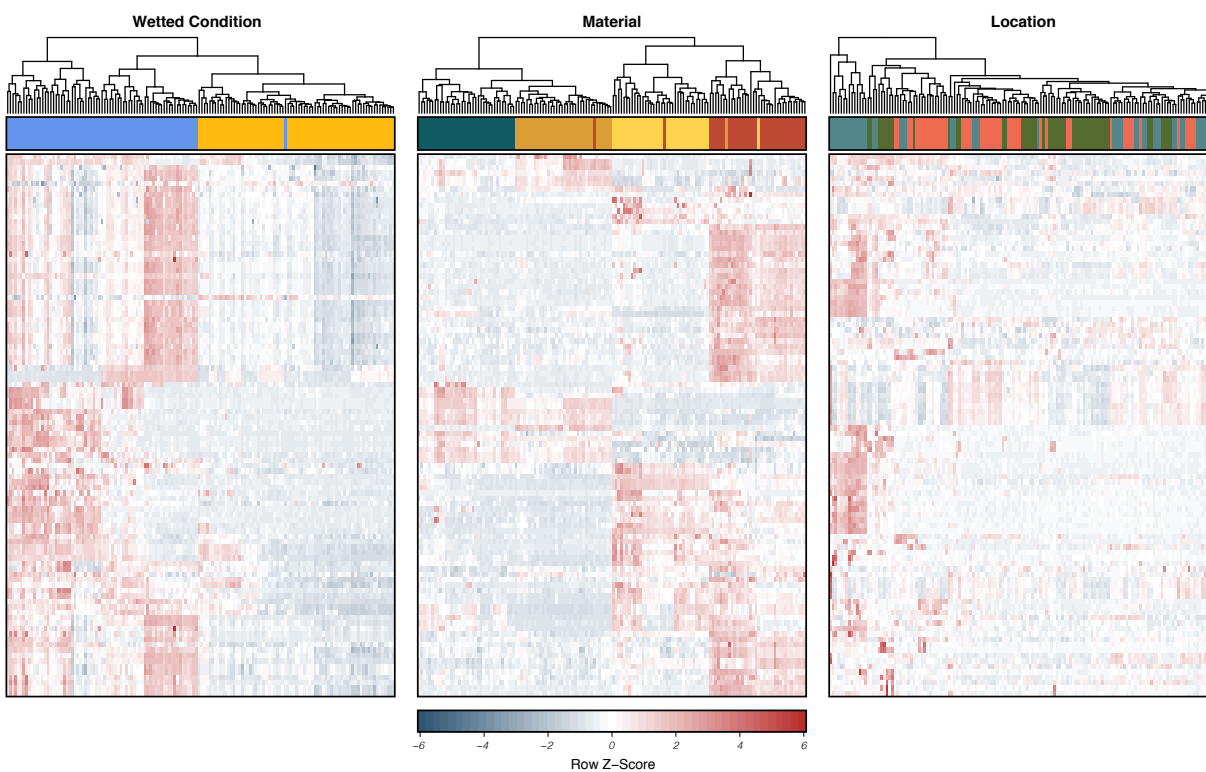

948  
949  
950  
951  
952  
953

**Figure S10: Random forest metabolite selection heatmap.** Random forest learning was used to select the metabolites that most distinctly identify each environmental condition, wetted or non-wetted, wood material type and inoculation location (n=144 samples and 3187 metabolites), the 100 highest-scoring metabolite features for each condition where selected for further examination.

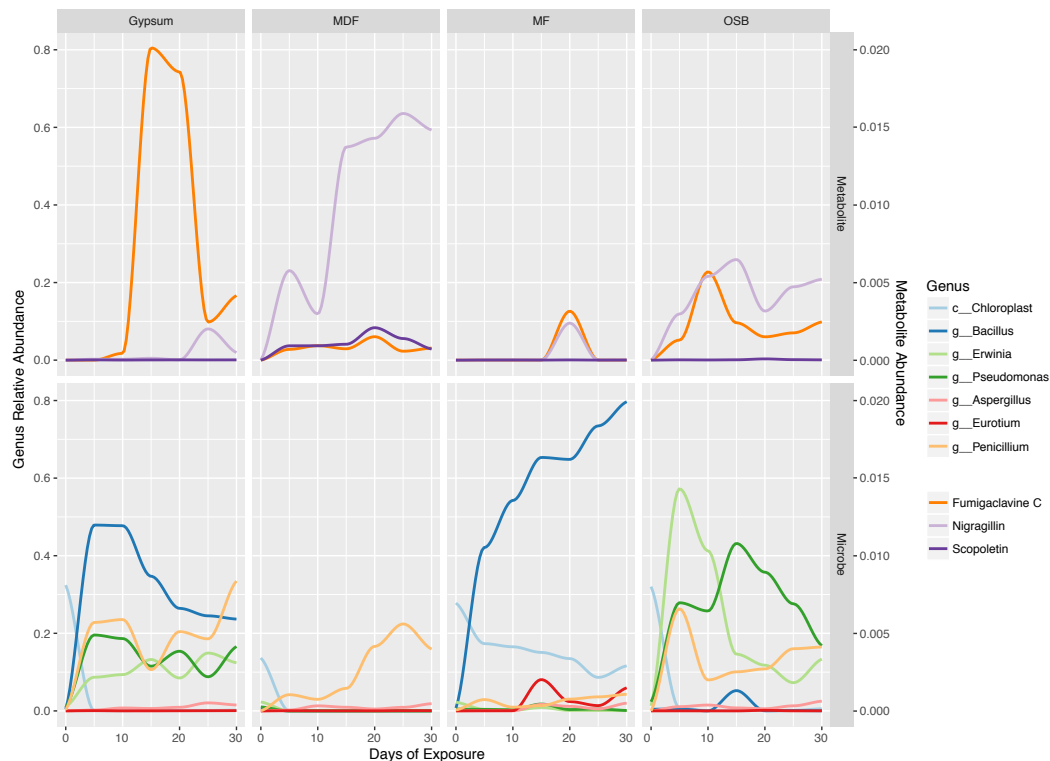

954

955

956

957

958

959

**Figure S11: Metabolite and microbial succession on wet samples by material over time.** Changes in the relative abundance of selected bacterial genera for each material over the course of succession (n=39, 58 and 72 wet samples for bacteria, fungi and metabolites, respectively). Lines represent a smoothed moving average of the mean. Genus and metabolites are indicated by different colors

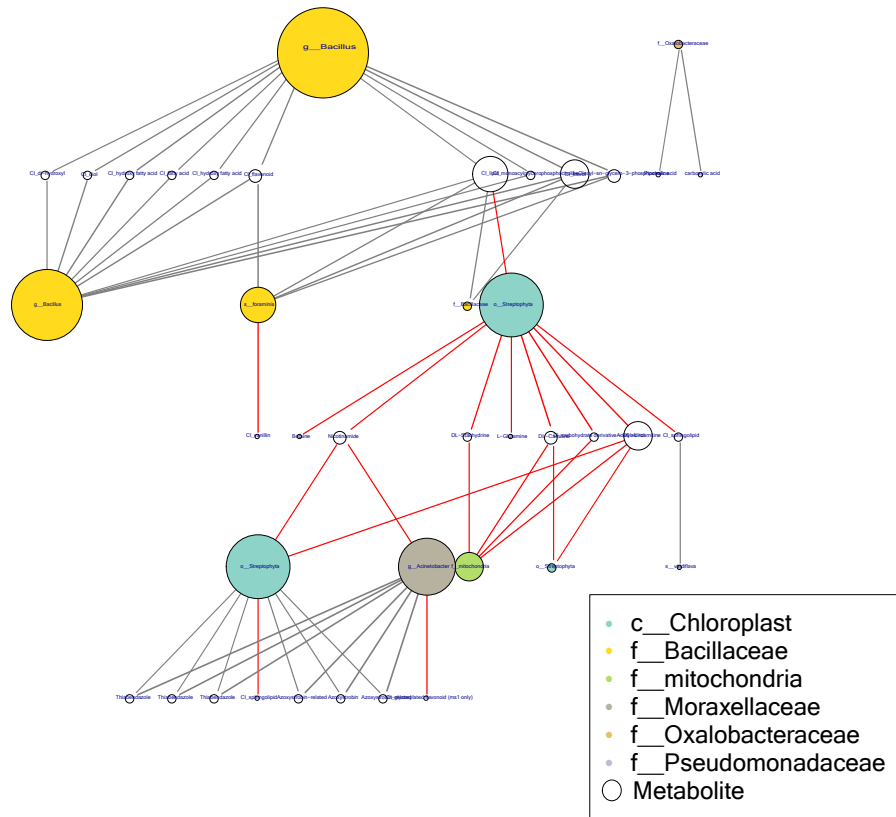

960  
961  
962  
963  
964  
965

**Figure S12: Bacteria-Metabolite co-occurrence network.** Bacteria and Metabolite paired co-occurrences suggesting biochemical exchanges (from n=83, 144 samples, respectively). Lipid and hydroxyl compounds are strongly connected to *Bacillaceae* groups. Some specific lipids correlate positively with bacteria and negatively with wood material (plants). Vitamins and small carbon compounds negatively correlate with the wood material (plants).

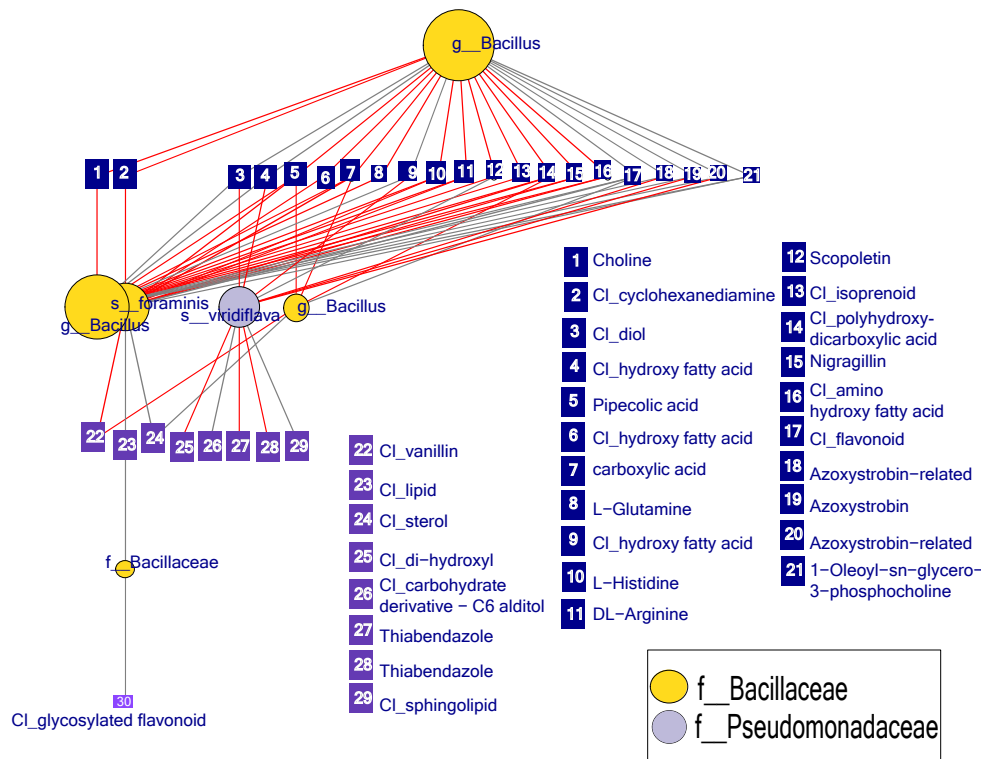

966  
 967 **Figure S13: Bacteria-Metabolite co-occurrence network for Bacillus and Pseudomonas**  
 968 **interactions only.** Bacteria and Metabolite paired co-occurrences suggesting biochemical  
 969 exchanges (from n=83, 144 samples, respectively). *Nigragillin* is negatively correlated with both  
 970 *Pseudomonas* and *Bacillus*. *Azoxystrobin* correlates negatively with *Pseudomonas*, but positively  
 971 with *Bacillus*. Hydroxyl compounds correlates negatively with *Pseudomonas* but positively with  
 972 *Bacillus*

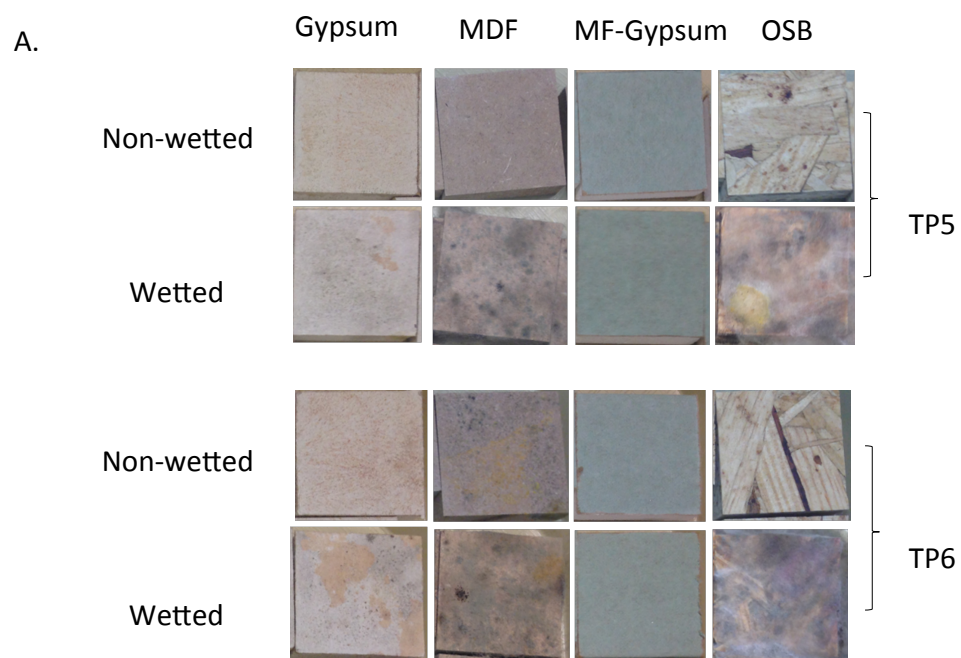

973

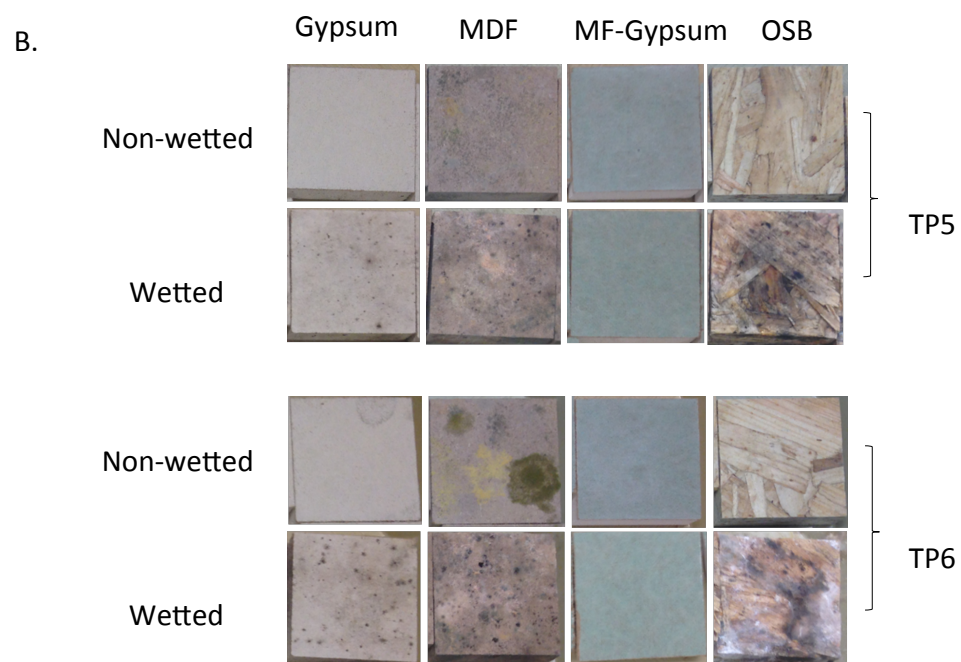

974

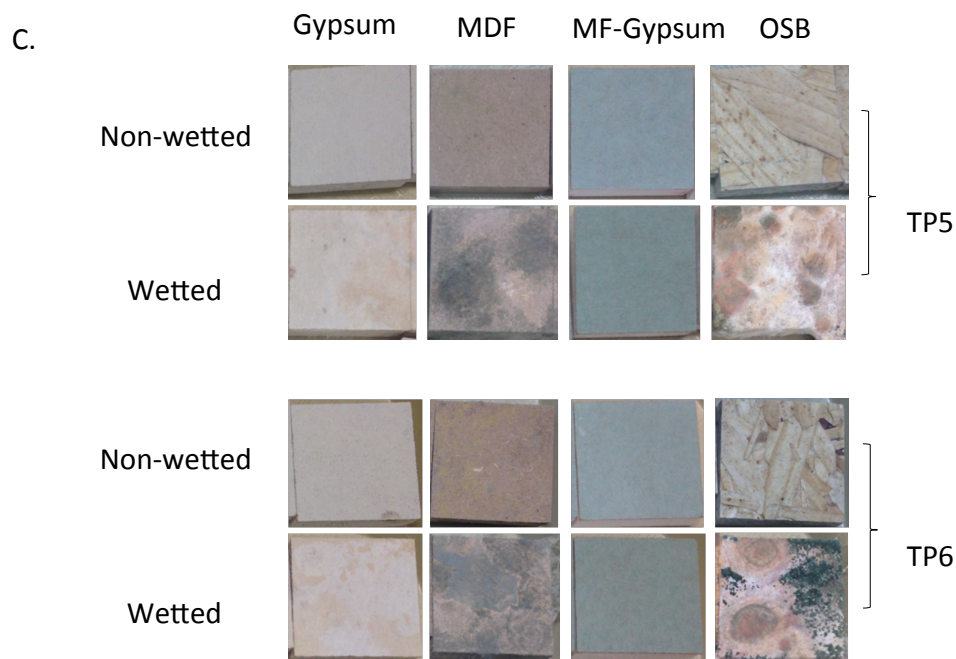

975  
976  
977  
978  
979  
980

**Figure S14: Photographs of wood coupons from different materials and wetting conditions at TP5 and TP6.** Bacterial and Fungal growth on coupons surface photographs for (A) location 1 (B) location 2 and (C) control location.

|                    | <u>Bacteria (16S)</u> |          | <u>Fungi (ITS)</u> |          | <u>Metabolomics</u> |          |
|--------------------|-----------------------|----------|--------------------|----------|---------------------|----------|
|                    | $R^2$                 | $p$      | $R^2$              | $p$      | $R^2$               | $p$      |
| Wetted             | 0.374                 | < 0.0001 | 0.450              | < 0.0001 | 0.204               | < 0.0001 |
| Timepoint          | 0.130                 | < 0.0001 | 0.094              | < 0.0001 | 0.178               | < 0.0001 |
| Control            | 0.074                 | < 0.0001 | 0.107              | < 0.0001 | 0.001               | 0.983    |
| Location 1         | 0.045                 | 0.0006   | 0.076              | 0.0006   | 0.009               | 0.502    |
| Location 2         | 0.214                 | < 0.0001 | 0.303              | < 0.0001 | 0.007               | 0.603    |
| Gypsum             | 0.085                 | < 0.0001 | 0.022              | 0.0271   | 0.141               | < 0.0001 |
| MDF                | 0.108                 | < 0.0001 | 0.009              | 0.2399   | 0.238               | < 0.0001 |
| MF Gypsum          | 0.027                 | 0.0095   | 0.008              | 0.2720   | 0.209               | < 0.0001 |
| OSB                | 0.041                 | 0.0015   | 0.002              | 0.762    | 0.503               | < 0.0001 |
| <i>Bacillus</i>    | 0.259                 | < 0.0001 | NA                 | NA       | NA                  | NA       |
| <i>Pseudomonas</i> | 0.088                 | < 0.0001 | NA                 | NA       | NA                  | NA       |
| <i>Erwinia</i>     | 0.098                 | < 0.0001 | NA                 | NA       | NA                  | NA       |
| Chloroplast        | 0.196                 | < 0.0001 | NA                 | NA       | NA                  | NA       |
| <i>Penicillium</i> | NA                    | NA       | 0.106              | < 0.0001 | NA                  | NA       |
| <i>Eurotium</i>    | NA                    | NA       | 0.185              | < 0.0001 | NA                  | NA       |

981

**Table S1: ANOSIM results calculate the factors significantly correlated with differences in the microbial communities across our three datasets, Bacteria, fungi, Metabolomics**

|        | REG    |              |    | RE     |              |    | RE.DUP |              |    | DUP    |              |    |
|--------|--------|--------------|----|--------|--------------|----|--------|--------------|----|--------|--------------|----|
|        | mantel | significance | n  | mantel | significance | n  | mantel | significance | n  | mantel | significance | n  |
| REG    | <NA>   |              |    | 0.67   | 1E-05        | 74 | 0.71   | 1E-05        | 79 | 0.81   | 1E-05        | 44 |
| RE     | 0.67   | 1E-05        | 74 | <NA>   |              |    | 0.85   | 1E-05        | 77 | 0.75   | 1E-05        | 40 |
| RE.DUP | 0.71   | 1E-05        | 79 | 0.85   | 1E-05        | 77 | <NA>   |              |    | 0.79   | 1E-05        | 39 |
| DUP    | 0.81   | 1E-05        | 44 | 0.75   | 1E-05        | 40 | 0.79   | 1E-05        | 39 | <NA>   |              |    |

**Table S2:** Mantel test results calculate the correlation among fungi samples across different sampling strategies.

|        | REG    |              |    | RE     |              |    | RE.DUP |              |    | DUP    |              |    |
|--------|--------|--------------|----|--------|--------------|----|--------|--------------|----|--------|--------------|----|
|        | mantel | significance | n  | mantel | significance | n  | mantel | significance | n  | mantel | significance | n  |
| REG    | <NA>   |              |    | 0.62   | 1E-05        | 75 | 0.56   | 1E-05        | 75 | 0.60   | 1E-05        | 35 |
| RE     | 0.62   | 1E-05        | 75 | <NA>   |              |    | 0.72   | 1E-05        | 80 | 0.53   | 1E-05        | 36 |
| RE.DUP | 0.56   | 1E-05        | 75 | 0.72   | 1E-05        | 80 | <NA>   |              |    | 0.50   | 1E-05        | 35 |
| DUP    | 0.63   | 1E-05        | 56 | 0.53   | 1E-05        | 36 | 0.50   | 1E-05        | 35 | <NA>   |              |    |

**Table S3:** Mantel test results calculate the correlation among bacteria samples across different sampling strategies.
